# Supplementary material
Source: publisher figshare collection journal article supplement (https://future-science-group.figshare.com/articles/dataset/_/22682695)

## Spectroscopic data (EI-MS) of compounds 1-28

HEI-ICCBS  
12/10/2020 3:43:15 PM

File: LUH-I-119a  
Sample: ISRAR-UL-HAQ /DR. KHALID  
Instrument: JEOL 600H-1  
Inlet: Direct Probe

Date Run: 12-10-2020 (Time Run: 15:33:40)

Ionization mode: EI+

Run By: MASS LAB-104

Scan: 3  
Base: m/z 188; 22.6%FS TIC: 1056690

#Ions: 993

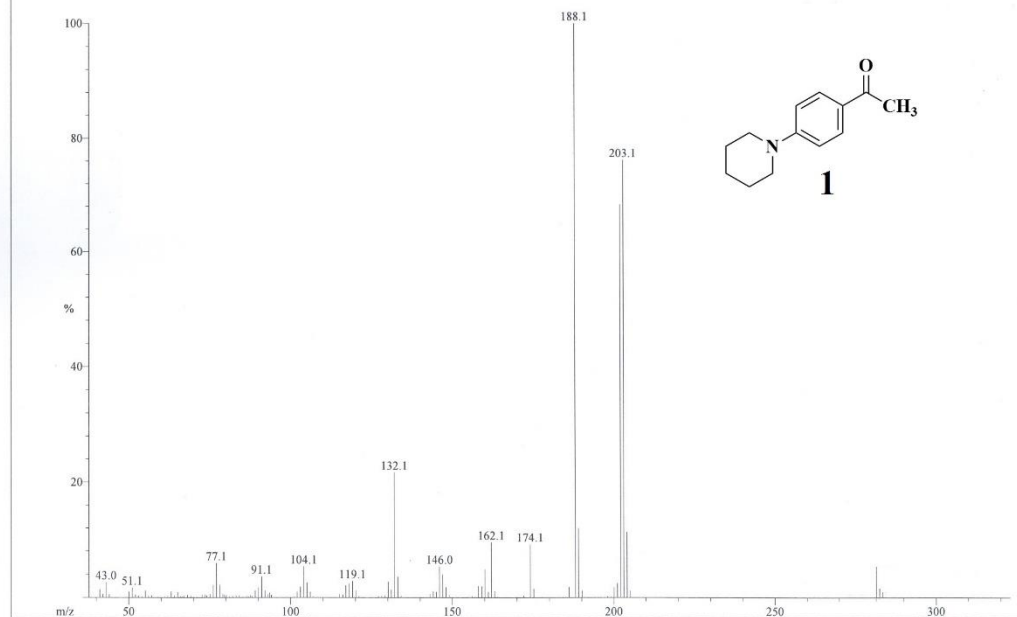



HEJ-ICCBS  
12/9/2020 3:10:36 PM

File: IUH-I-121a Date Run: 12-09-2020 (Time Run: 14:58:50)  
Sample: ISRAR UL HAQ / DR. KHALID KHAN  
Instrument: JEOL 600H-1  
Inlet: Direct Probe

Run By: MASS LAB-104

Ionization mode: EI+

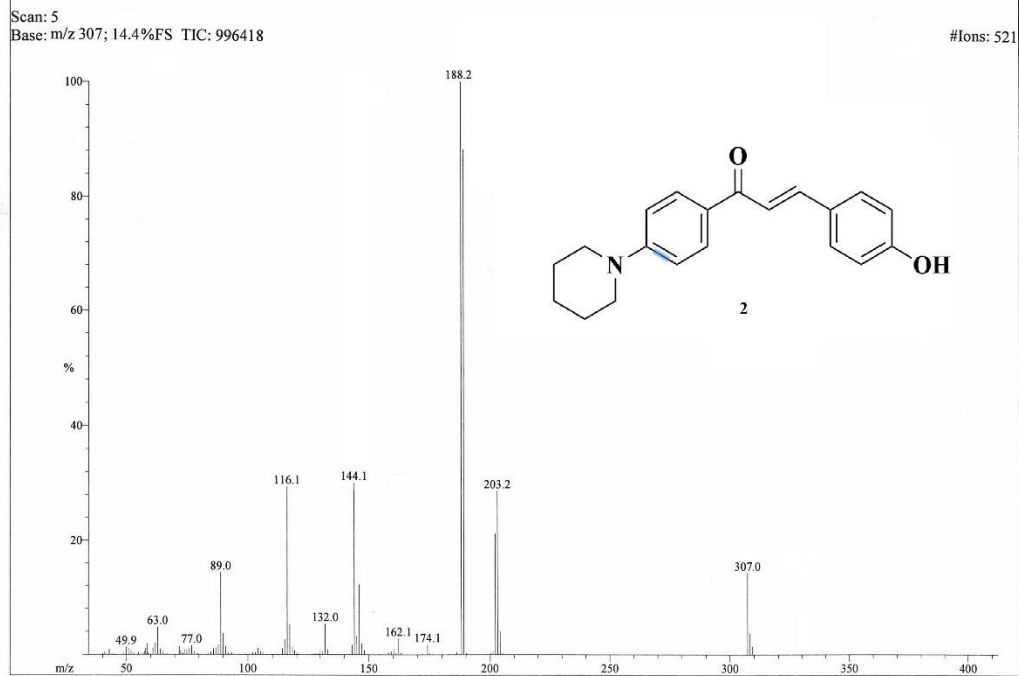



HEJ-ICCBS  
12/9/2020 3:10:36 PM

File: IUH-I-141a Date Run: 12-09-2020 (Time Run: 14:58:50)  
Sample: ISRAR UL HAQ / DR. KHALID KHAN  
Instrument: JEOL 600H-1  
Inlet: Direct Probe

Run By: MASS LAB-104

Ionization mode: EI+

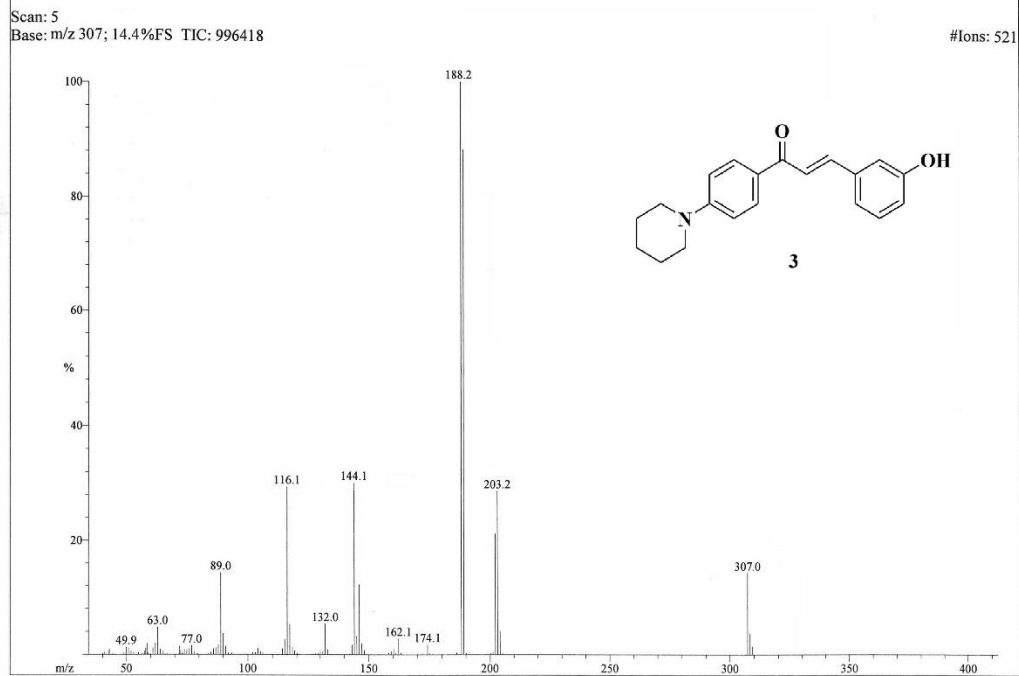



HEJ-ICCBS  
12/10/2020 3:22:01 PM

File: LUH-I-127a  
Sample: ISRAR-UL-HAQ /DR. KHALID  
Instrument: JEOL 600H-1  
Inlet: Direct Probe

Date Run: 12-10-2020 (Time Run: 15:12:17)

Ionization mode: EI+

Run By: MASS LAB-104

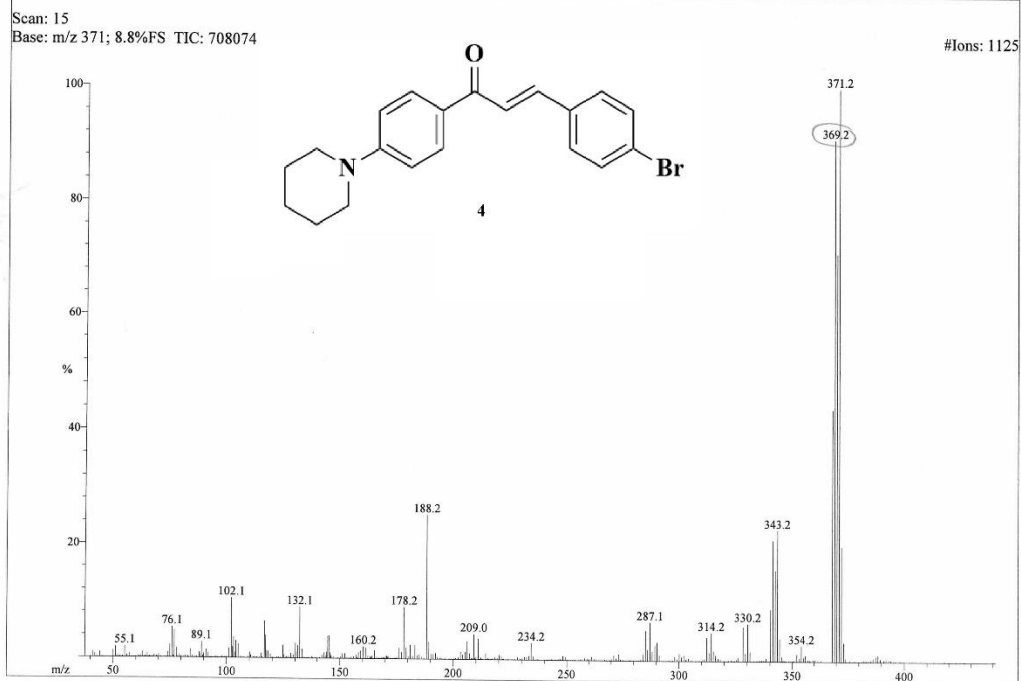



HEJ-ICCBS  
12/3/2020 4:33:30 PM

File: LUH-I-95a  
Sample: ISRAR-UL-HAQ /DR. KHALID  
Instrument: JEOL 600H-1  
Inlet: Direct Probe

Date Run: 12-03-2020 (Time Run: 16:26:37)

Ionization mode: EI+

Run By: MASS LAB-104

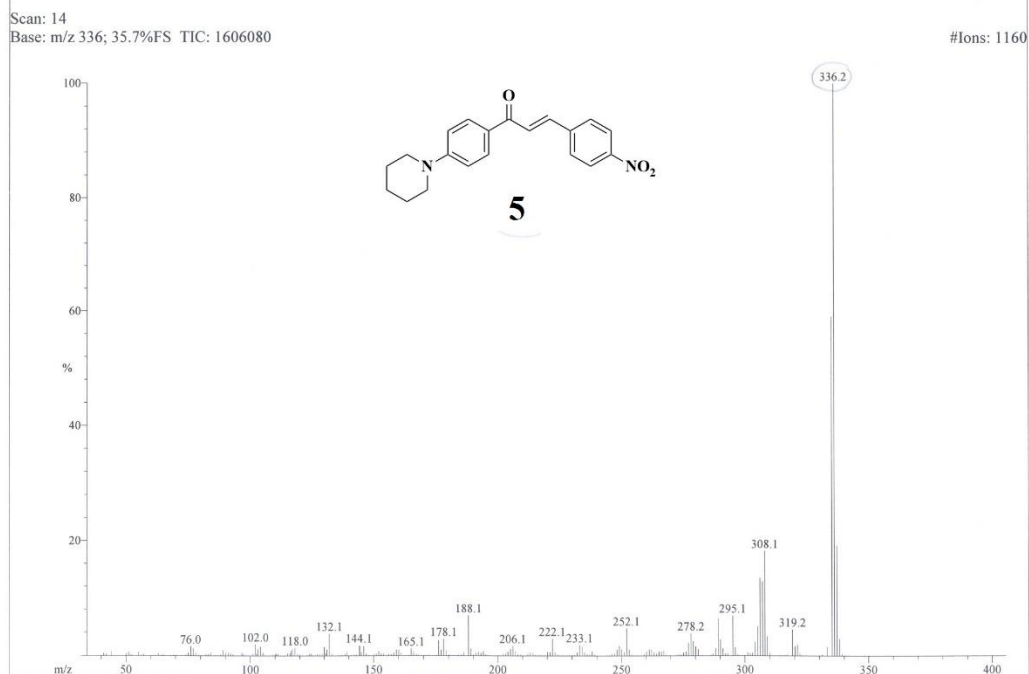



HEJ-ICCBS  
12/7/2020 12:33:54 PM

File: LUH-I-107a  
Sample: ISRAR-UL-HAQ /DR. KHALID  
Instrument: JEOL 600H-1  
Inlet: Direct Probe

Date Run: 12-07-2020 (Time Run: 12:22:12)

Ionization mode: EI+

Run By: MASS LAB-104

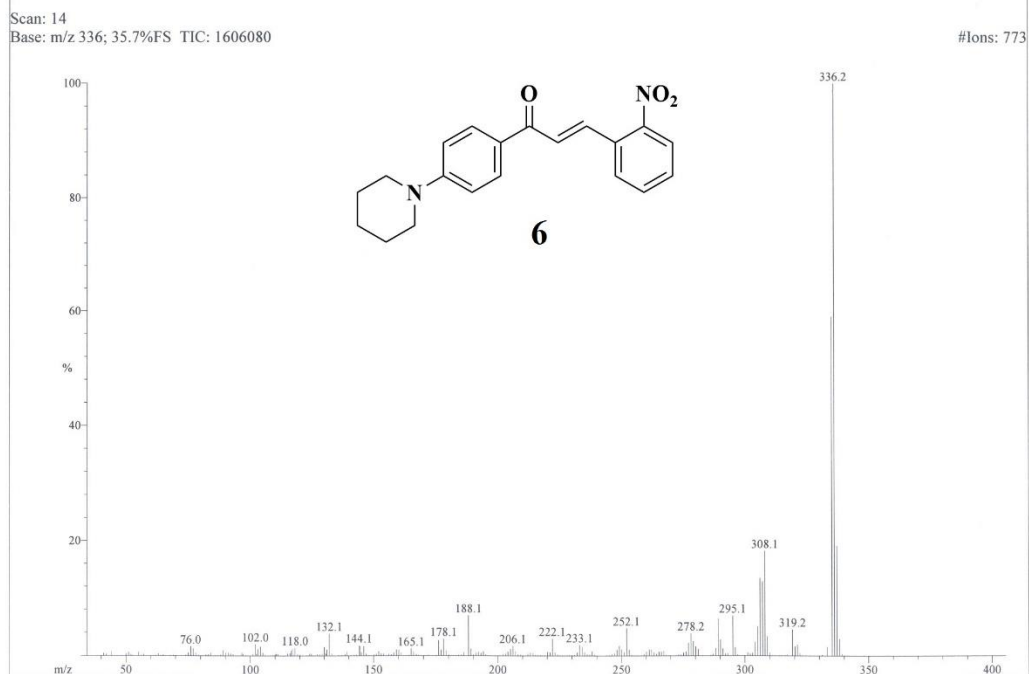



HEJ-ICCBS  
12/7/2020 12:15:49 PM

File: LUH-I-109A  
Sample: ISRAR-UL-HAQ /DR. KHALID  
Instrument: JEOL 600H-1  
Inlet: Direct Probe

Date Run: 12-07-2020 (Time Run: 12:02:36)

Ionization mode: EI+

Run By: MASS LAB-104

Scan: 21

Base: m/z 188; 28.8%FS TIC: 2442312

#Ions: 900

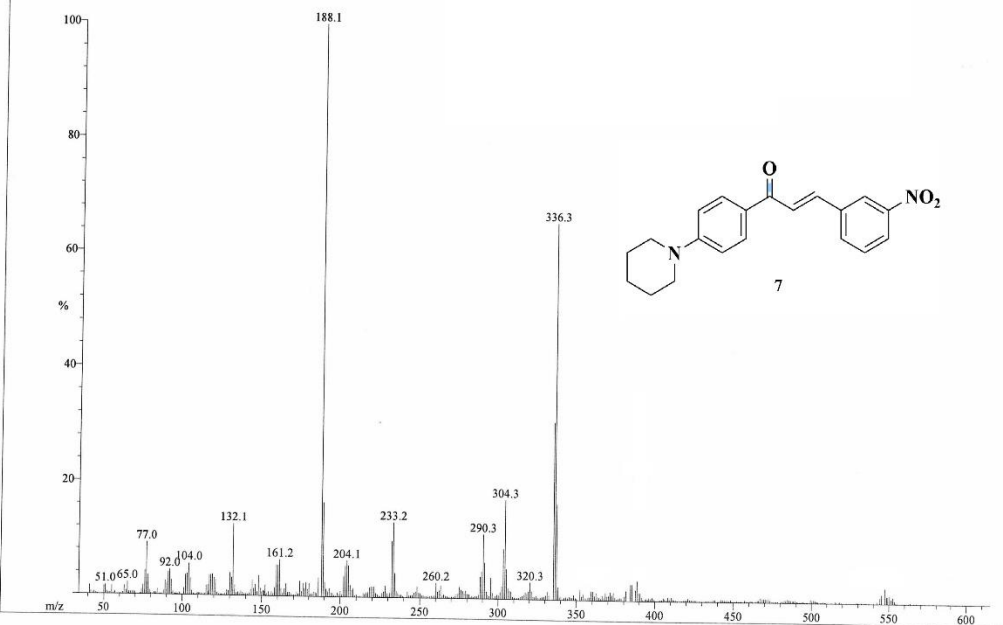



HEJ-ICCBS  
12/7/2020 12:31:38 PM

File: LUH-I-107a  
Sample: ISRAR-UL-HAQ /DR. KHALID  
Instrument: JEOL 600H-1  
Inlet: Direct Probe

Date Run: 12-07-2020 (Time Run: 12:22:12)

Ionization mode: EI+

Run By: MASS LAB-104

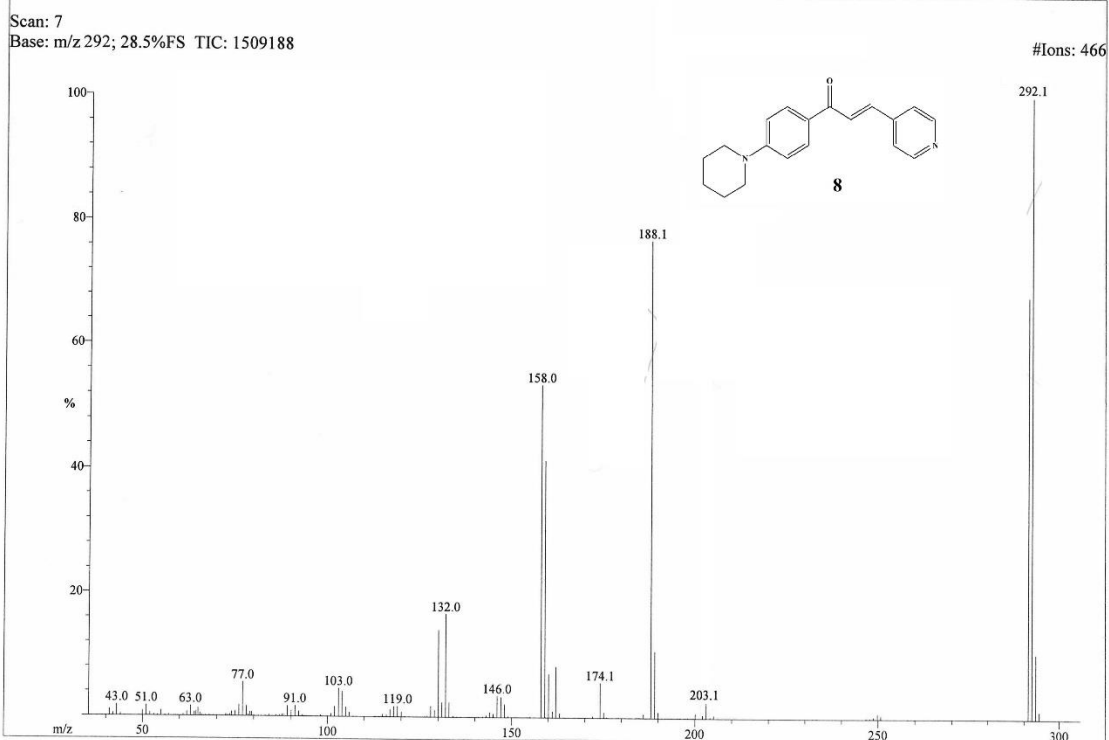



HEJ-ICCBS  
12/14/2020 3:01:59 PM

File: IUH-I-143a  
Sample: IZHAR-UL-HAQ /DR. KHALID  
Instrument: JEOL 600H-I  
Inlet: Direct Probe

Date Run: 12-14-2020 (Time Run: 14:48:05)

Ionization mode: EI+

Run By: MASS LAB-104

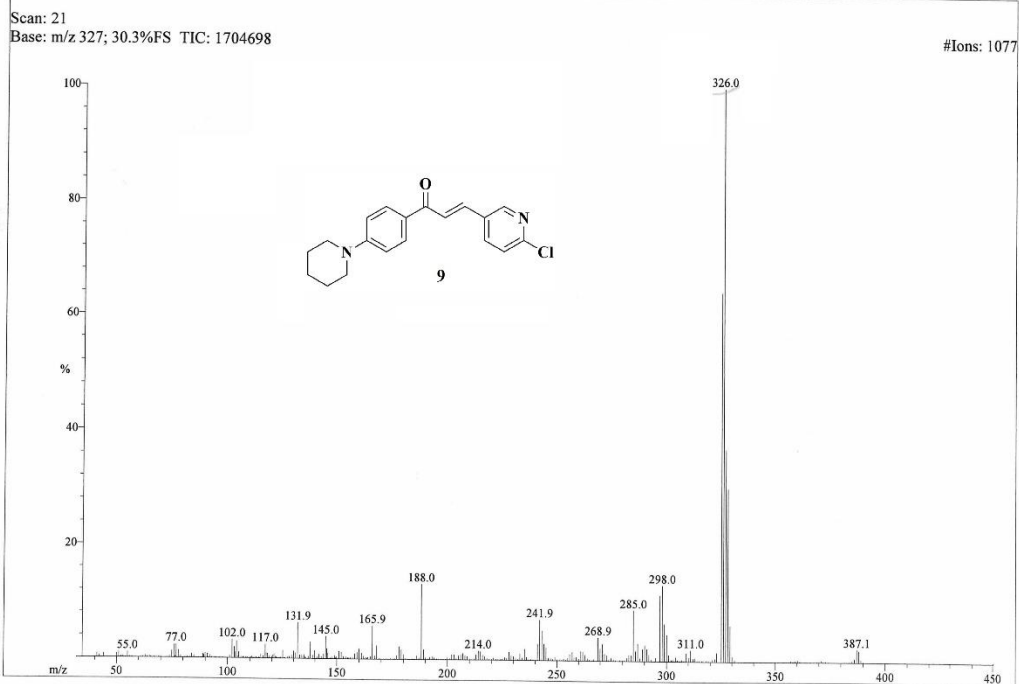



HEJ-ICCBS  
12/4/2020 10:12:14 AM

File: LUH-I-115a  
Sample: ISRAR-UL-HAQ /DR. KHALID  
Instrument: JEOL 600H-1  
Inlet: Direct Probe

Date Run: 12-04-2020 (Time Run: 09:46:54)

Ionization mode: EI+

Run By: MASS LAB-104

Scan: 9

Base: m/z 290; 30.4%FS TIC: 1250142

#Ions: 791

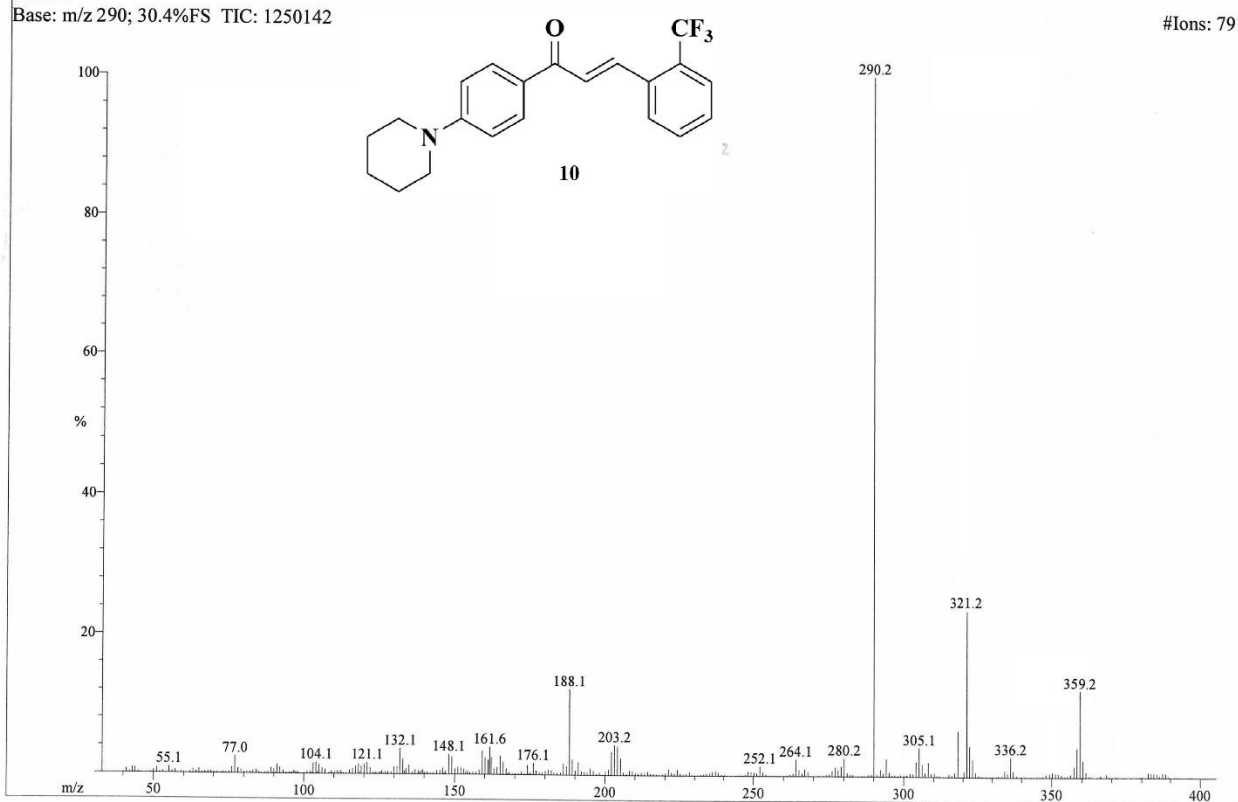



HEJ-ICCBS  
12/4/2020 9:40:42 AM

File: LUH-I-104a  
Sample: ISRAR-UL-HAQ /DR. KHALID  
Instrument: JEOL 600H-1  
Inlet: Direct Probe

Date Run: 12-04-2020 (Time Run: 08:58:09)

Ionization mode: EI+

Run By: MASS LAB-104

Scan: 17

Base: m/z 323; 19.9%FS TIC: 1678160

#Ions: 888

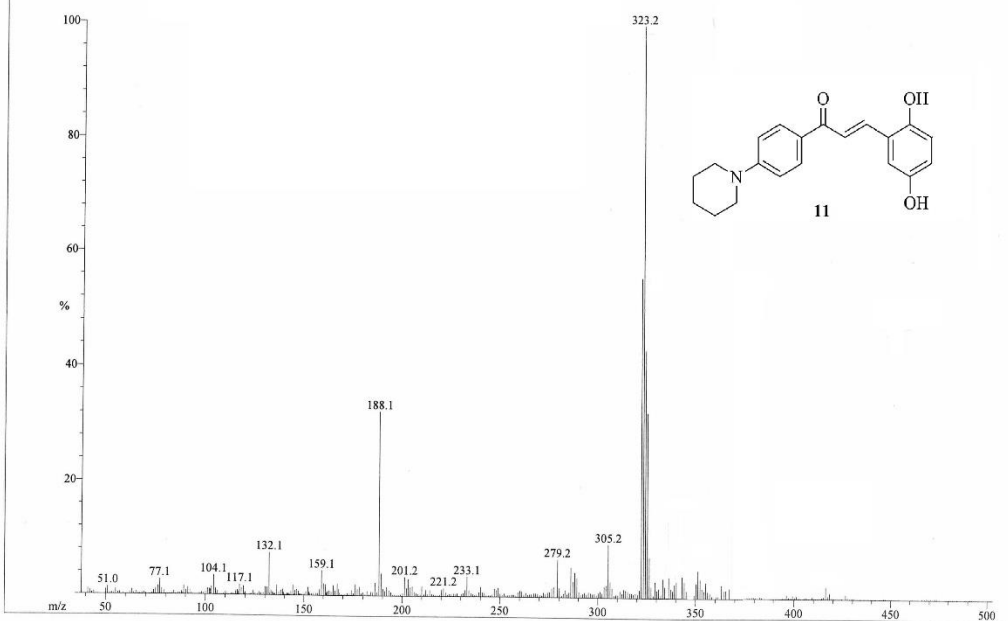



HEJ-ICCBS  
12/4/2020 10:12:14 AM

File: LUH-I-105a  
Sample: ISRAR-UL-HAQ /DR. KHALID  
Instrument: JEOL 600H-1  
Inlet: Direct Probe

Date Run: 12-04-2020 (Time Run: 09:46:54)

Ionization mode: EI+

Run By: MASS LAB-104

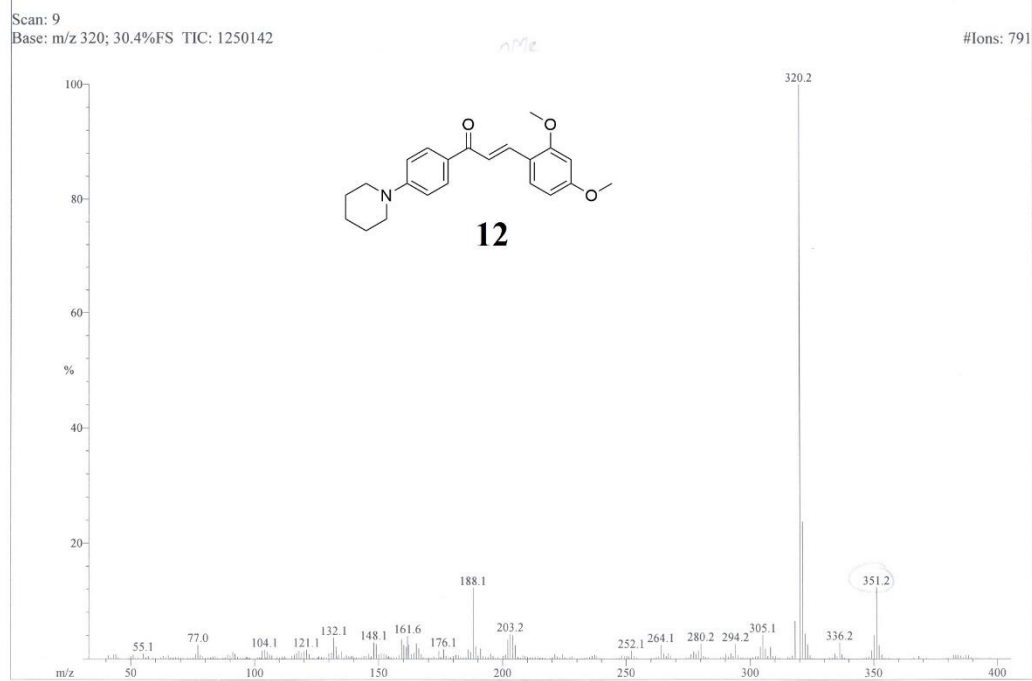



HEJ-ICCBS  
11/25/2020 11:10:44 AM

File: LUH-I-89a  
Sample: ISRAR-UL-HAQ /DR. KHALID  
Instrument: JEOL 600H-1  
Inlet: Direct Probe

Date Run: 11-25-2020 (Time Run: 11:01:48)

Ionization mode: EI+

Run By: MASS LAB-104

Scan: 12  
Base: m/z 320; 99.9%FS TIC: 3433614

#Ions: 639

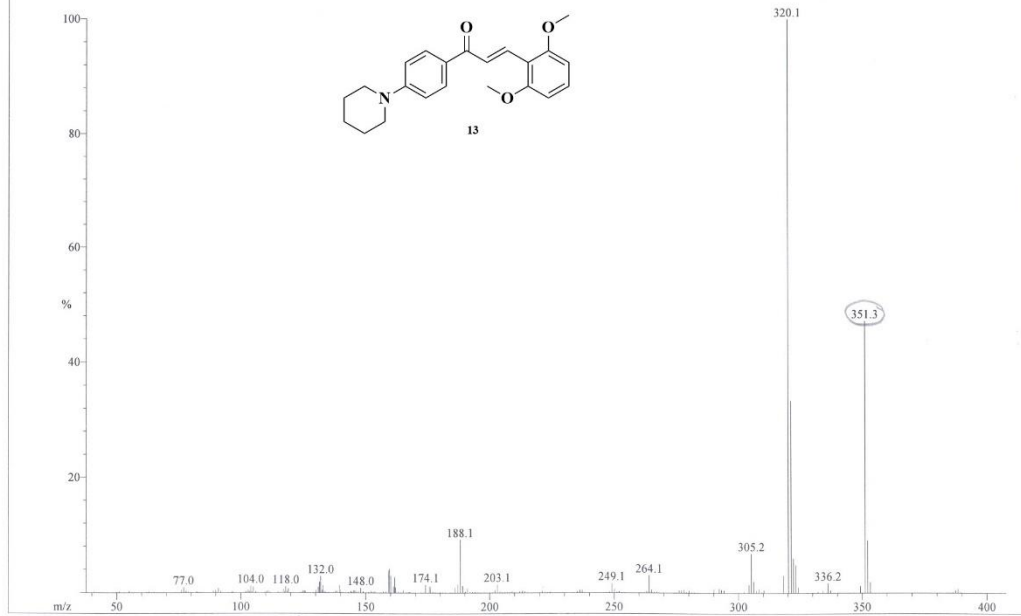



HEJ-ICCBS  
12/24/2020 12:14:03 PM

File: IUH-I-149a  
Sample: ISRAR-IL-HAQ /DR. KHALID  
Instrument: JEOL 600H-1  
Inlet: Direct Probe

Date Run: 12-24-2020 (Time Run: 12:05:32)

Ionization mode: EI+

Run By: MASS LAB-104

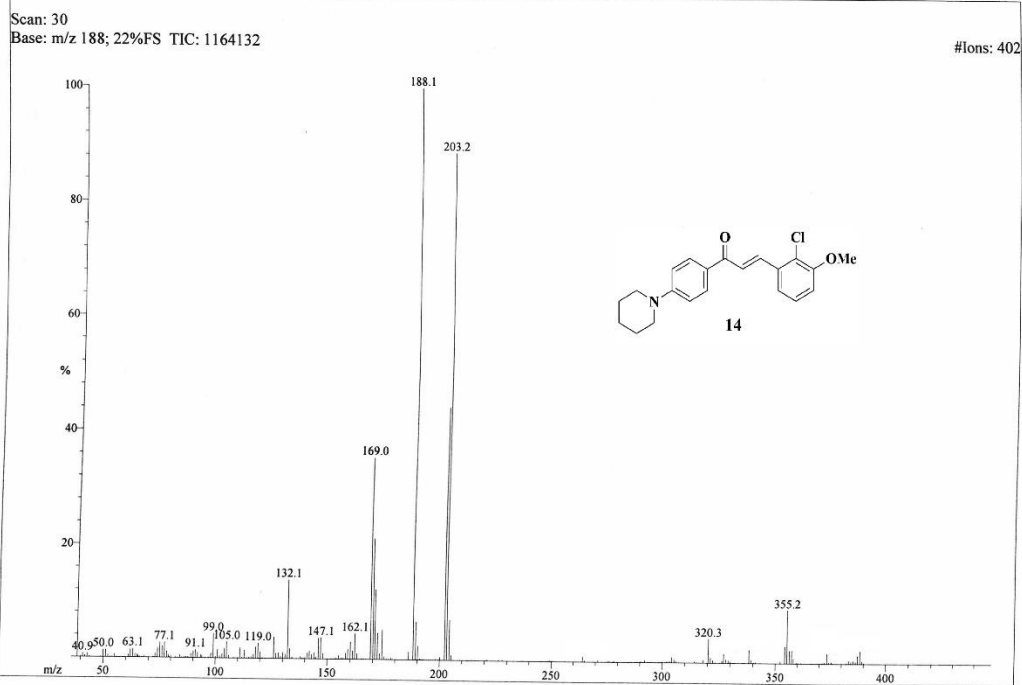



HEJ-ICCBS  
10/19/2020 3:54:52 PM

File: BU-L-79  
Sample: BUSHRA /DR. KHALID  
Instrument: JEOL 600H-1  
Inlet: Direct Probe

Date Run: 10-19-2020 (Time Run: 15:38:41)

Ionization mode: EI+

Run By: MASS LAB-104

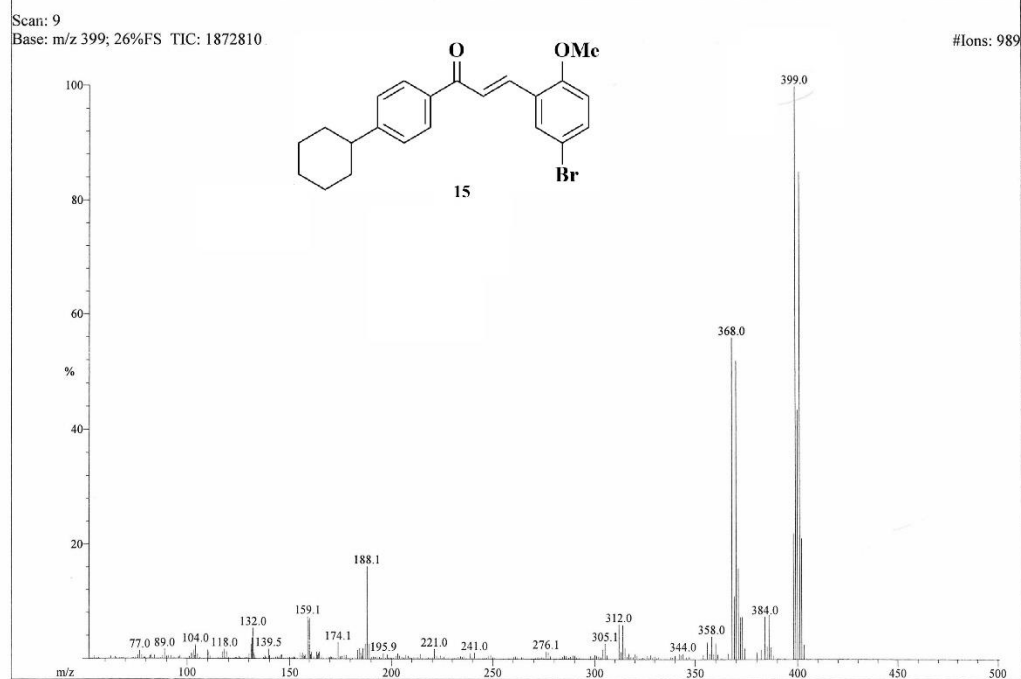



HEJ-ICCBS  
12/3/2020 2:52:16 PM

File: LUH-I-93a  
Sample: ISRAR-UL-HAQ /DR. KHALID  
Instrument: JEOL 600H-1  
Inlet: Direct Probe

Date Run: 12-03-2020 (Time Run: 14:39:39)

Ionization mode: EI+

Run By: MASS LAB-104

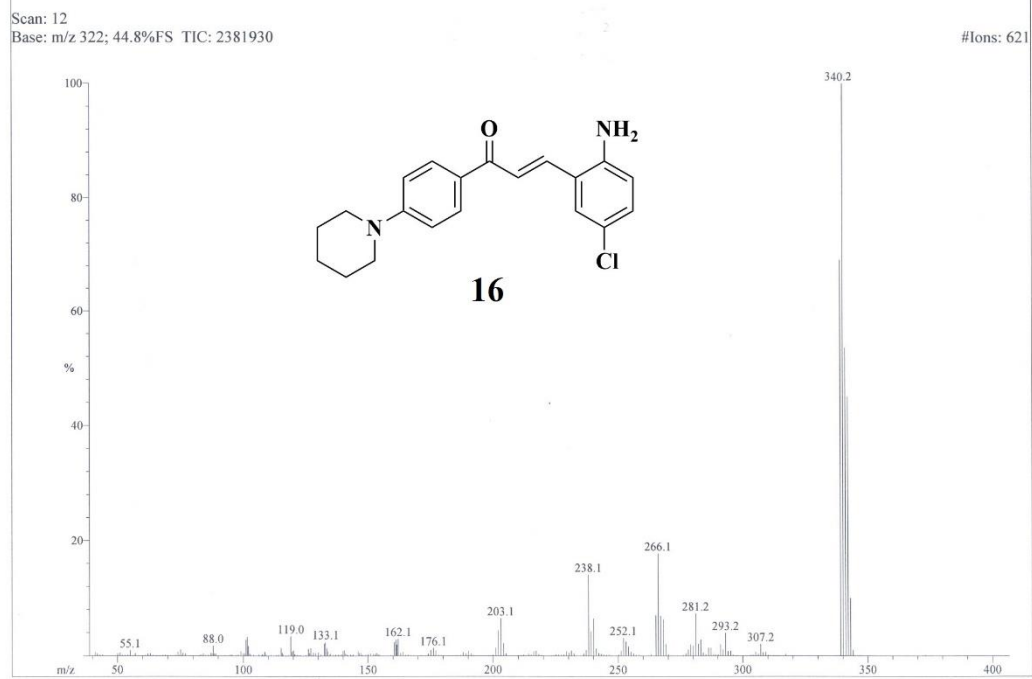



HEJ-ICCBS  
12/4/2020 9:40:42 AM

File: LUH-I-101a  
Sample: ISRAR-UL-HAQ /DR. KHALID  
Instrument: JEOL 600H-1  
Inlet: Direct Probe

Date Run: 12-04-2020 (Time Run: 08:58:09)

Ionization mode: EI+

Run By: MASS LAB-104

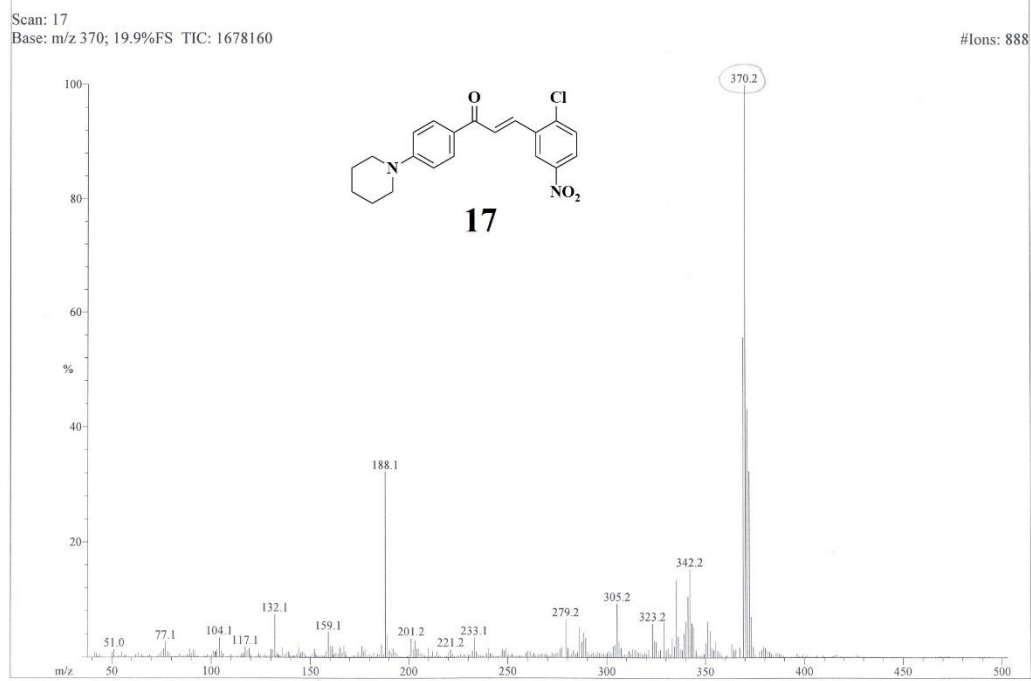



HEJ-ICCBS  
12/9/2020 2:59:43 PM

File: IUH-I-117a Date Run: 12-09-2020 (Time Run: 14:49:16)  
Sample: ISRAR UL HAQ / DR. KHALID KHAN  
Instrument: JEOL 600H-1  
Inlet: Direct Probe

Run By: MASS LAB-104

Ionization mode: EI+

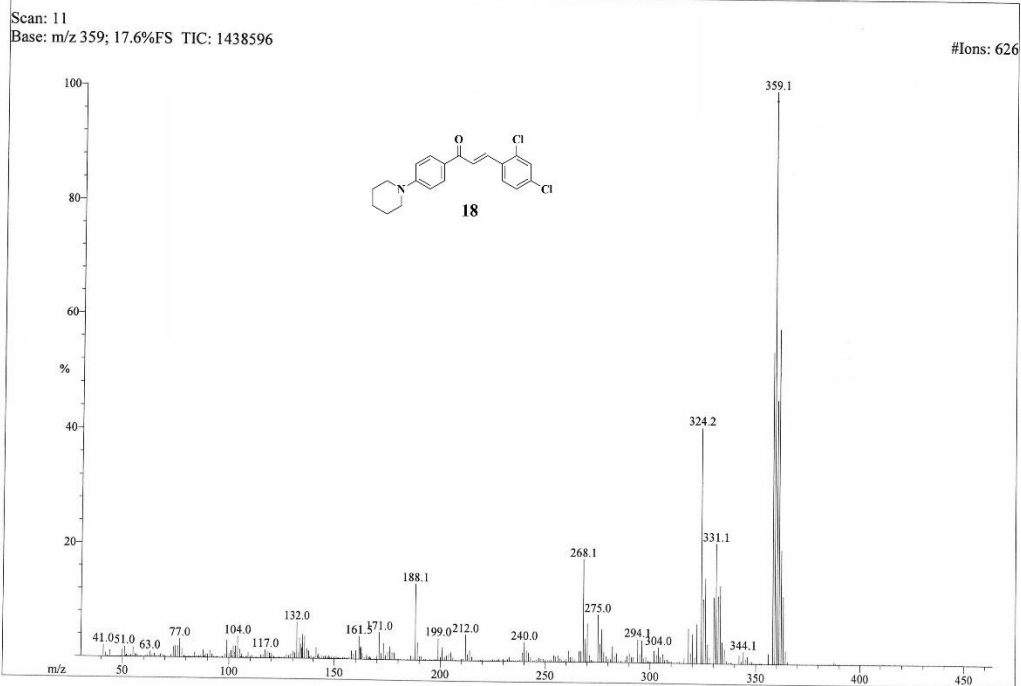



HEJ-ICCBS  
12/14/2020 3:11:36 PM

File: IUH-I-145a  
Sample: IZHAR-UL-HAQ /DR. KHALID  
Instrument: JEOL 600H-1  
Inlet: Direct Probe

Date Run: 12-14-2020 (Time Run: 15:05:21)

Ionization mode: EI+

Run By: MASS LAB-104

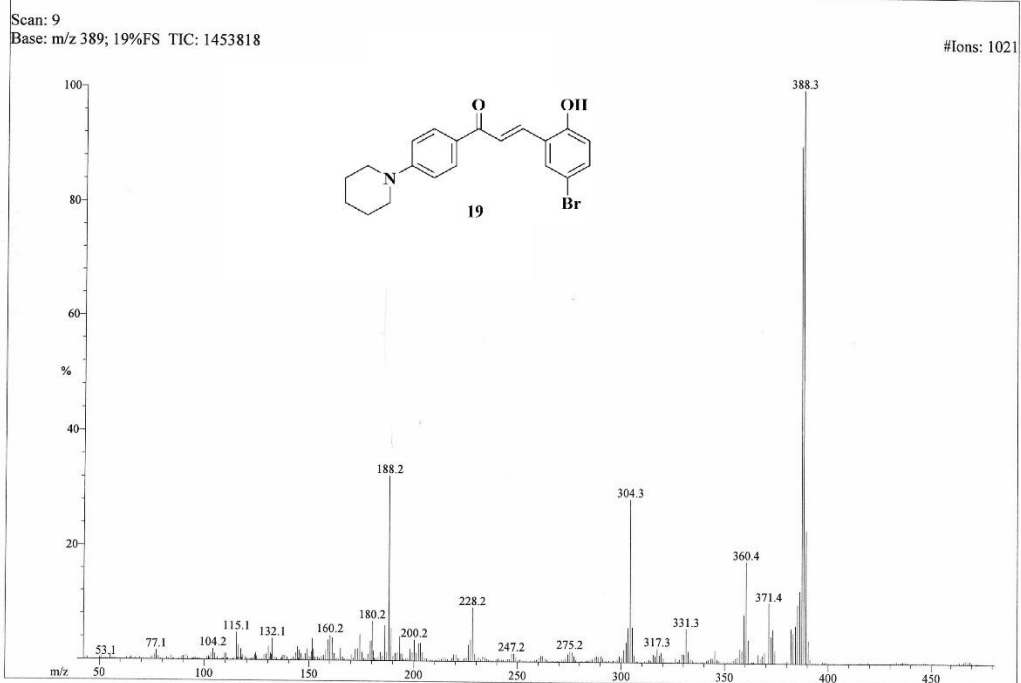



HEJ-ICCBS  
12/24/2020 1:48:33 PM

File: IUH-I-151a  
Sample: ISRAR-IL-HAQ /DR. KHALID  
Instrument: JEOL 600H-1  
Inlet: Direct Probe

Date Run: 12-24-2020 (Time Run: 12:58:39)

Ionization mode: EI+

Run By: MASS LAB-104

Scan: 20

Base: m/z 350; 15.7%FS TIC: 603900

#Ions: 318

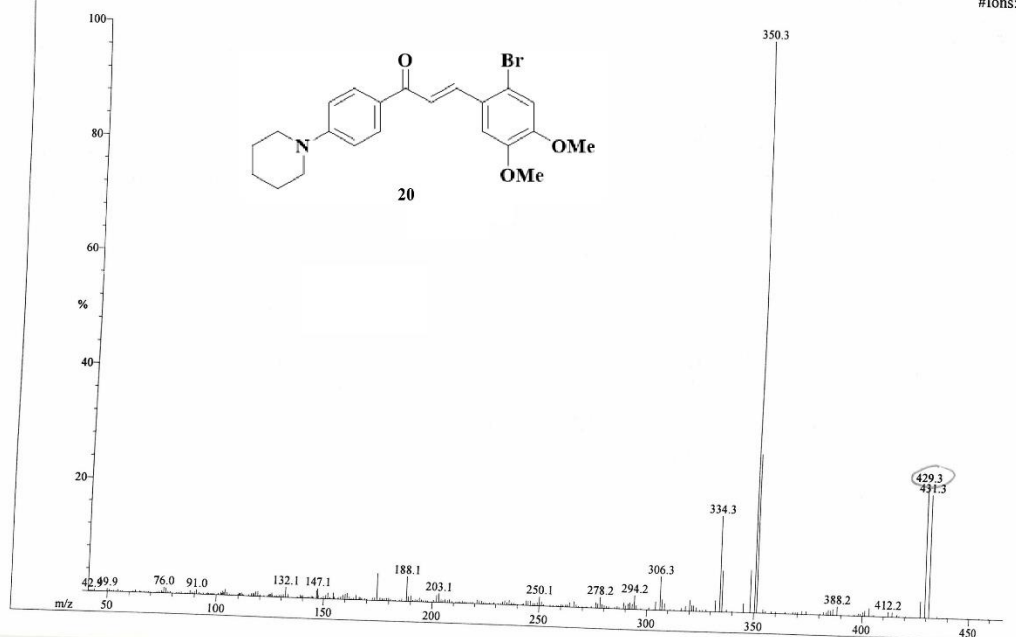



HEJ-ICCBS  
12/14/2020 3:13:06 PM

File: IUH-I-115a  
Sample: IZHAR-UL-HAQ /DR. KHALID  
Instrument: JEOL 600H-1  
Inlet: Direct Probe

Date Run: 12-14-2020 (Time Run: 15:05:21)

Ionization mode: EI+

Run By: MASS LAB-104

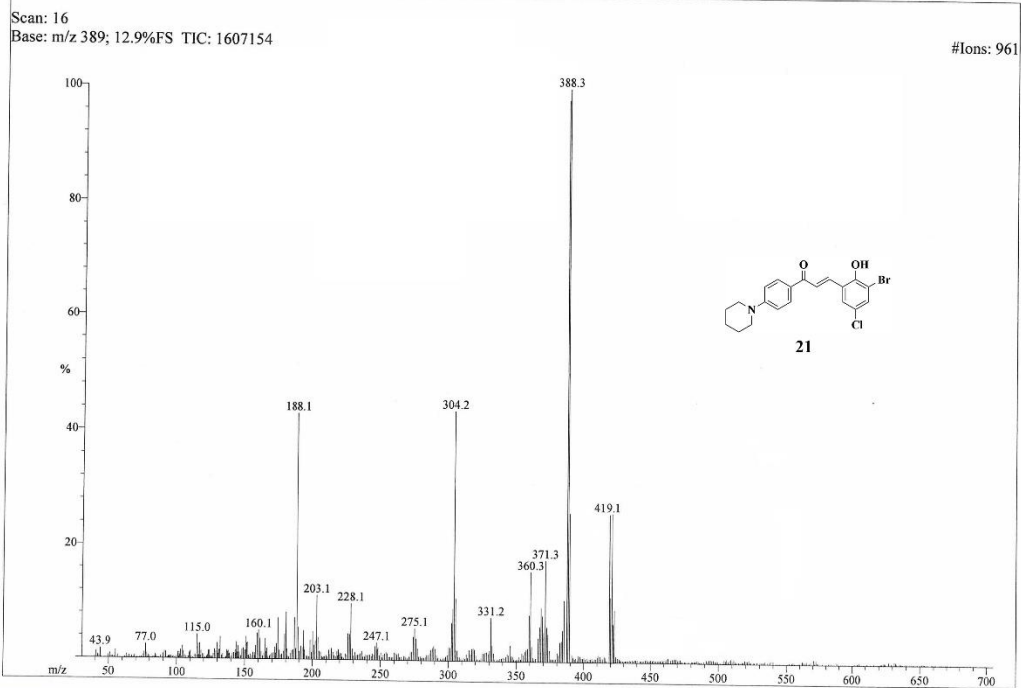



HEJ-ICCBS  
12/10/2020 3:43:15 PM

File: LUH-I-125a  
Sample: ISRAR-UL-HAQ /DR. KHALID  
Instrument: JEOL 600H-1  
Inlet: Direct Probe

Date Run: 12-10-2020 (Time Run: 15:33:40)

Ionization mode: EI+

Run By: MASS LAB-104

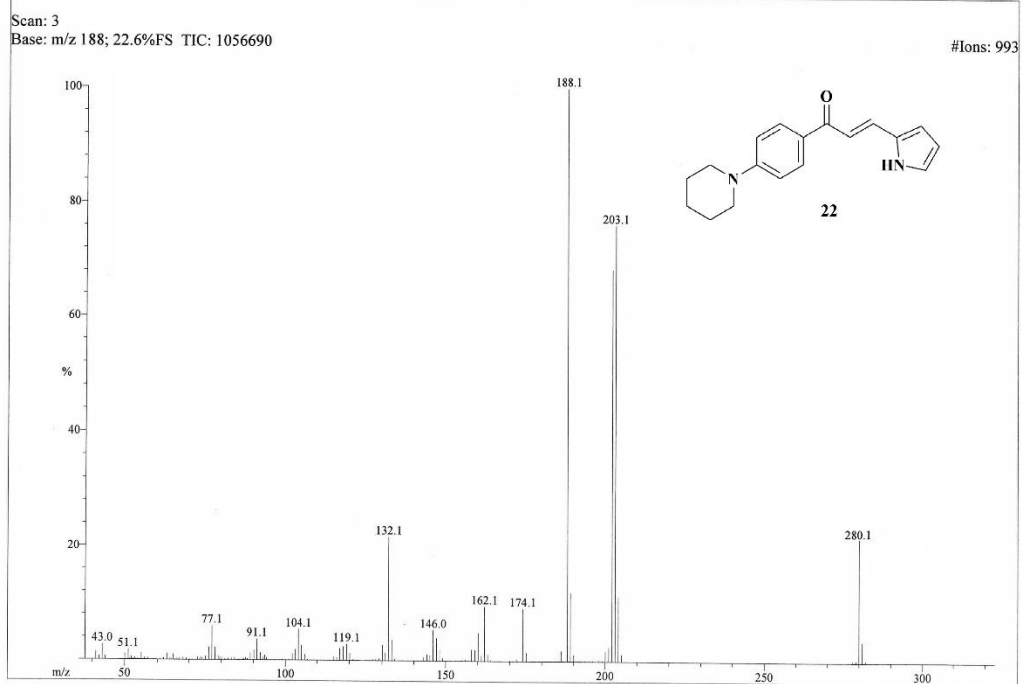



HEJ-ICCBS  
12/14/2020 2:24:52 PM

File: IUH-I-133a  
Sample: IZHAR-UL-HAQ /DR. KHALID  
Instrument: JEOL 600H-1  
Inlet: Direct Probe

Date Run: 12-14-2020 (Time Run: 12:42:26)

Run By: MASS LAB-104

Ionization mode: EI+

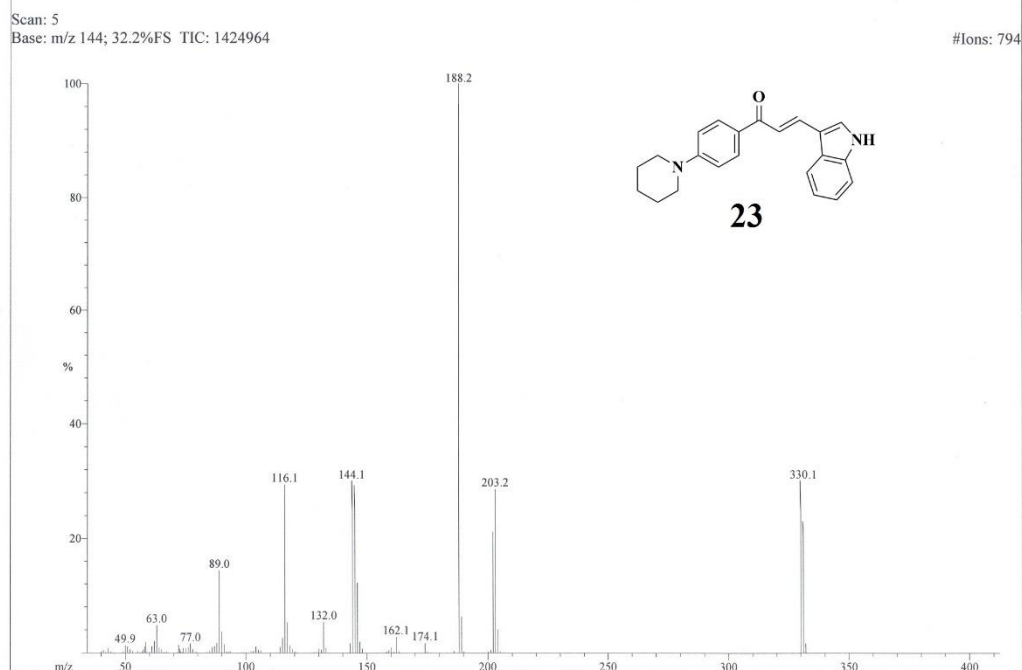



HEJ-ICCBS  
11/27/2020 12:33:11 PM

File: LUH-I-131a  
Sample: ISRAR-UL- HAQ /DR. KHALID  
Instrument: JEOL 600H-1  
Inlet: Direct Probe

Date Run: 11-27-2020 (Time Run: 12:24:55)

Ionization mode: EI+

Run By: MASS LAB-104

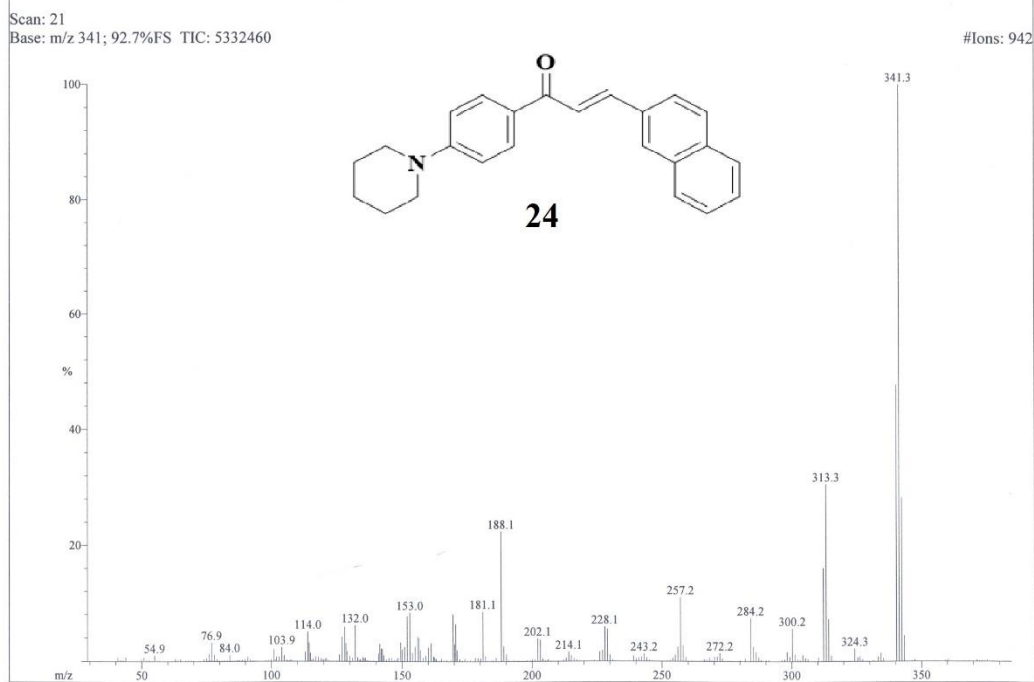



HEJ-ICCBS  
12/4/2020 9:40:42 AM

File: LUH-I-104a  
Sample: ISRAR-UL-HAQ /DR. KHALID  
Instrument: JEOL 600H-1  
Inlet: Direct Probe

Date Run: 12-04-2020 (Time Run: 08:58:09)

Ionization mode: EI+

Run By: MASS LAB-104

Scan: 17

Base: m/z 367; 19.9%FS TIC: 1678160

#Ions: 888

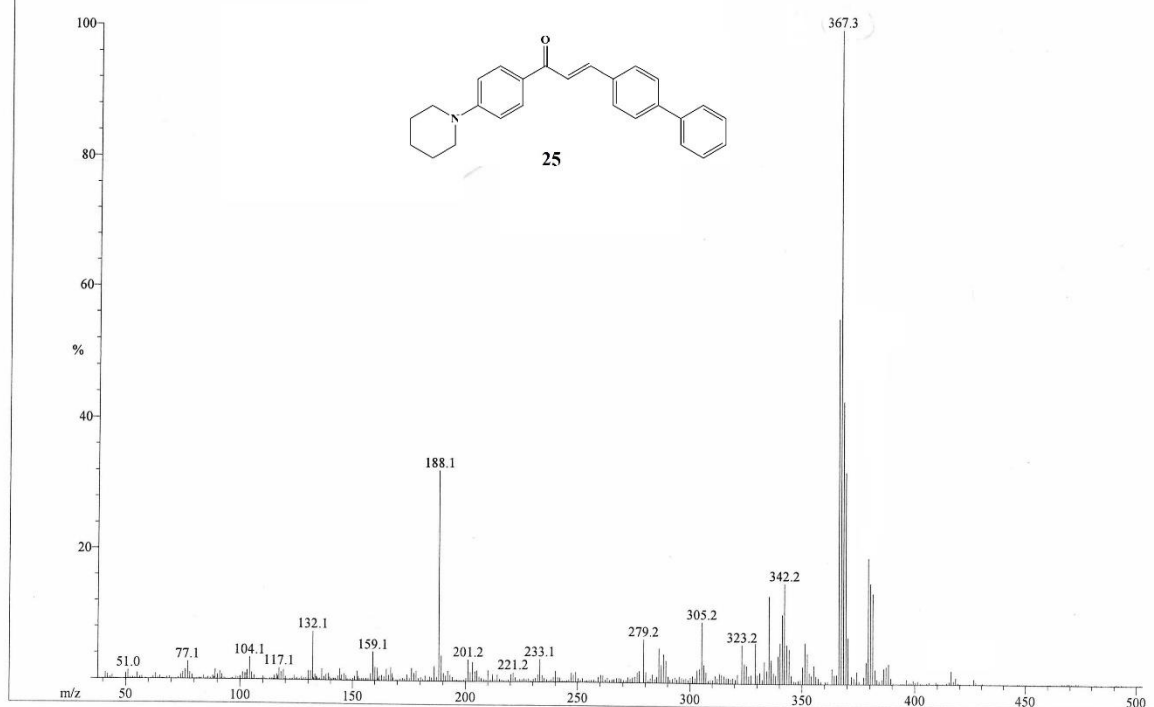



HEJ-ICCBS  
12/9/2020 3:12:01 PM

File: IUH-I-123a Date Run: 12-09-2020 (Time Run: 14:58:50)  
Sample: ISRAR UL HAQ / DR. KHALID KHAN  
Instrument: JEOL 600H-1  
Inlet: Direct Probe

Run By: MASS LAB-104

Ionization mode: EI+

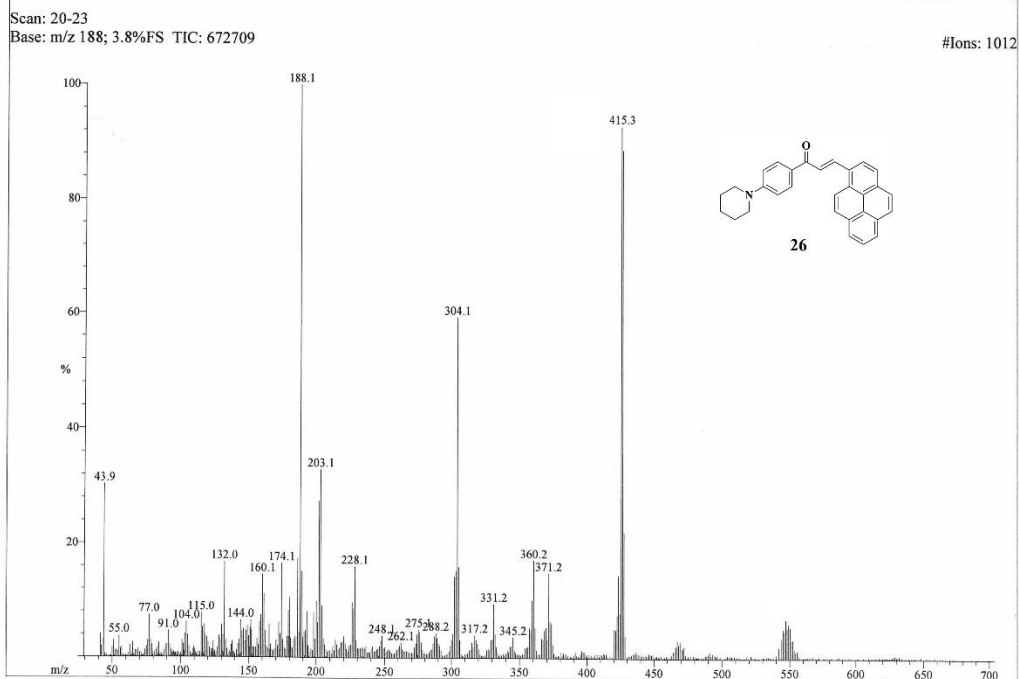



HEJ-ICCBS  
11/25/2020 10:58:24 AM

File: LUH-I-91a  
Sample: ISRAR-UL-HAQ/DR. KHALID  
Instrument: JEOL 600H-1  
Inlet: Direct Probe

Date Run: 11-25-2020 (Time Run: 10:46:36)

Ionization mode: EI+

Run By: MASS LAB-104

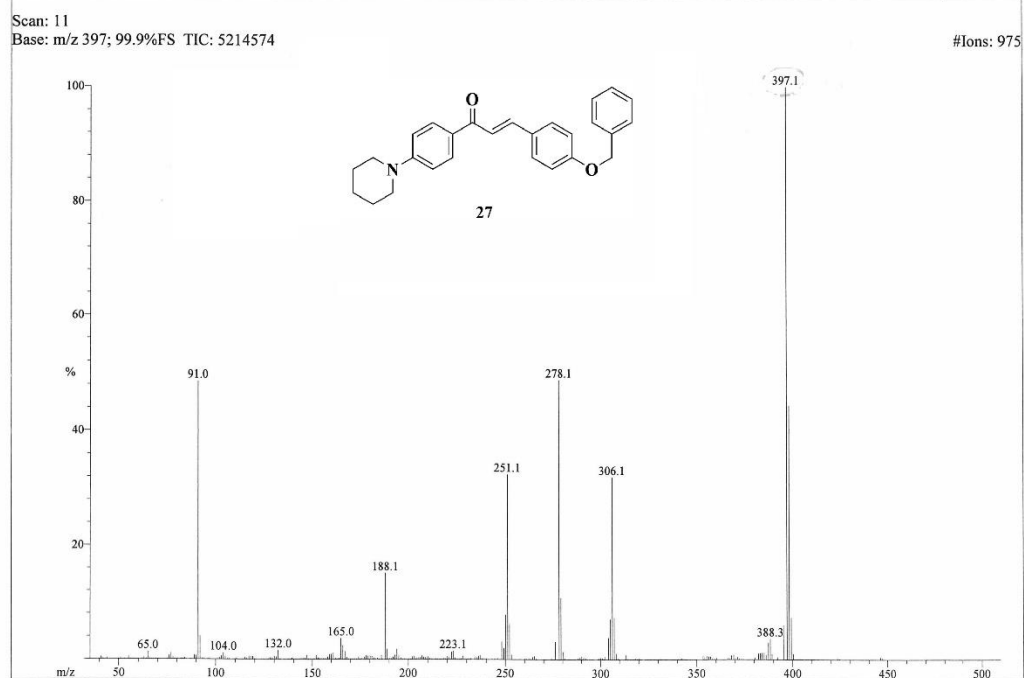



HEJ-ICCBS  
11/25/2020 10:59:34 AM

File: LUH-I-165a  
Sample: ISRAR-UL-HAQ /DR. KHALID  
Instrument: JEOL 600H-1  
Inlet: Direct Probe

Date Run: 11-25-2020 (Time Run: 10:46:36)

Ionization mode: EI+

Run By: MASS LAB-104

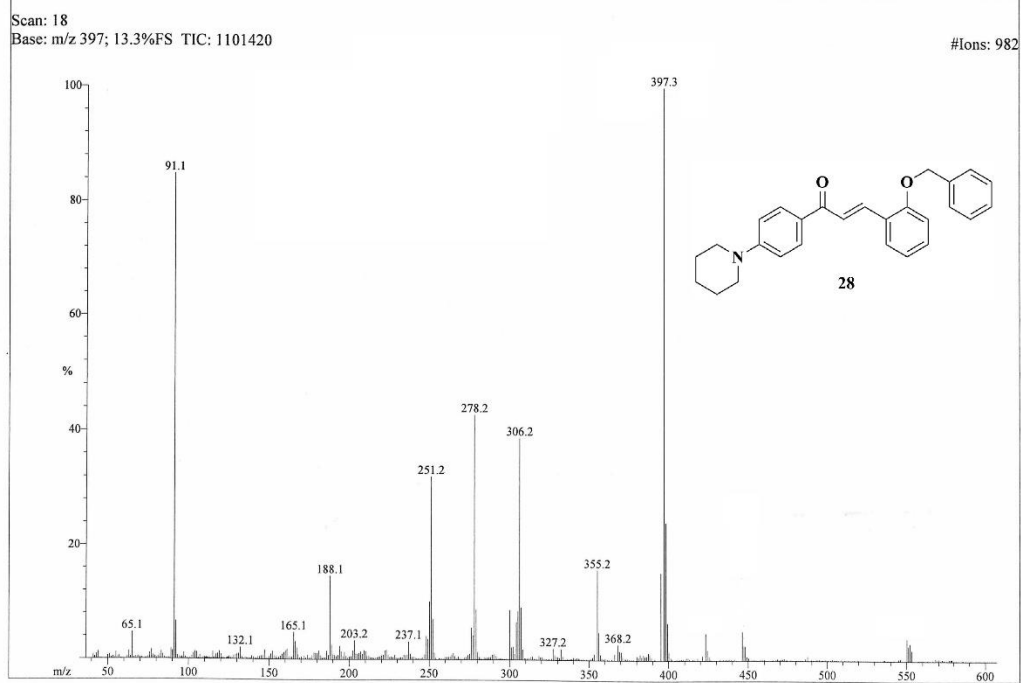

Supplement: Supplementary file 2 [file 1]
