# Supplementary material
Source: publisher figshare collection journal article supplement (https://future-science-group.figshare.com/articles/dataset/_/22682695)
Supplement: Supplementary file 1 [file 1]

# Spectroscopic data (<sup>1</sup>H-NMR and <sup>13</sup>C-NMR) of compounds 1-28

Israr-ul-Haq/ Dr Khalid/ IUH-I-119a/ DMSO  
<sup>1</sup>H-NMR

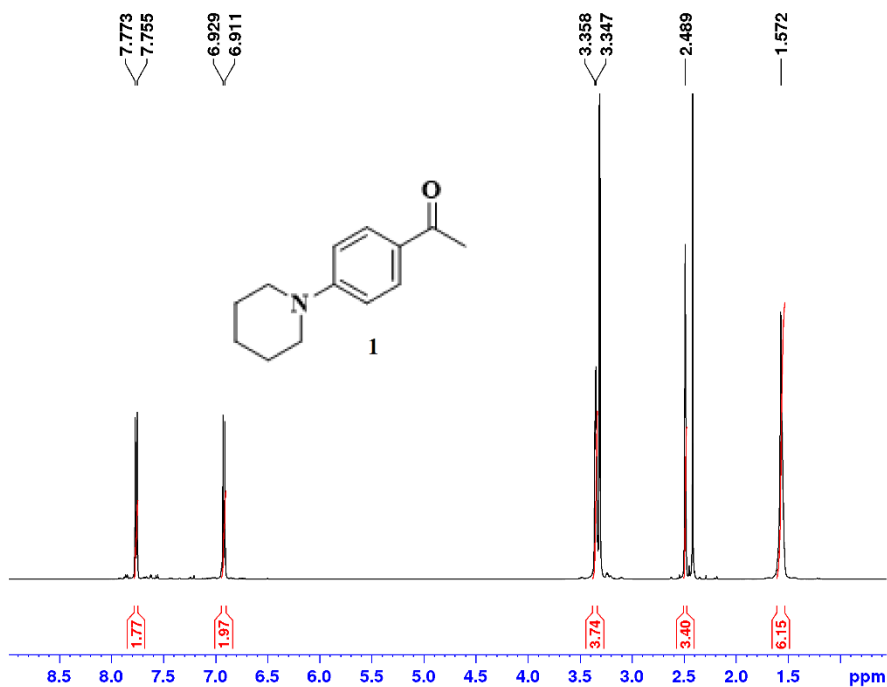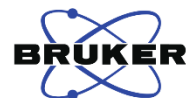

Current Data Parameters  
NAME Dec24-2020  
EXPNO 6  
PROCNO 1

F2 - Acquisition Parameters  
Date\_ 20201224  
Time 16.16 h  
INSTRUM Avance Neo 500  
PROBHD ZSXC7\_0198 (PH  
PULPROG zg30  
TD 32768  
SOLVENT DMSO  
NS 64  
DS 0  
SWH 10000.000 Hz  
FIDRES 0.610352 Hz  
AQ 1.6384000 sec  
RG 100  
CW 50.000 usec  
DE 6.50 usec  
TE 298.0 K  
D1 1.5000000 sec  
TDC 1  
SFO 500.3340026 MHz  
NUC1 1H  
PC 3.33 usec  
PI 10.00 usec  
PLWL 10.0000000 W

F2 - Processing parameters  
SI 6584  
SF 500.3300090 MHz  
WDW EX  
SSB 0  
LB 0.30 Hz  
GB 0  
PC 1.00

Israr-ul-Haq/ Dr Khalid/ IUH-I-121a/ DMSO  
<sup>1</sup>H

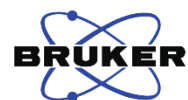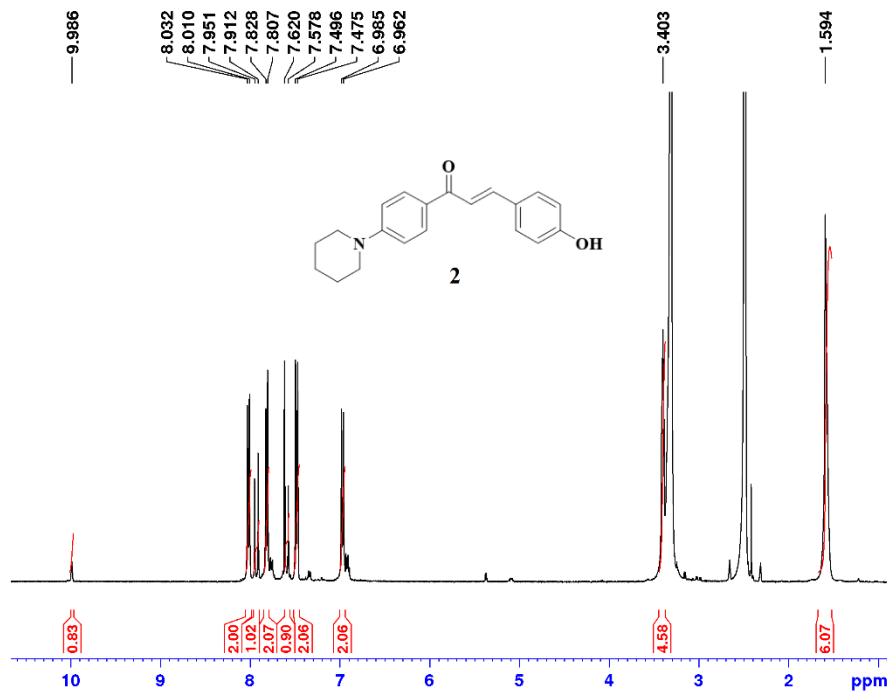

Current Data Parameters  
NAME dec15-20  
EXPNO 8  
PROCNO 1

F2 - Acquisition Parameters  
Date\_ 20201213  
Time 15.10 h  
INSTRUM AVNeo\_400  
PROBHD zgpg30  
PULPROG zgpg30  
TD 32768  
SOLVENT DMSO  
NS 64  
DS 0  
SWH 7812.500 Hz  
FIDRES 0.476937 Hz  
AQ 2.0971520 sec  
RG 101  
DN 64.000 usec  
DE 14.30 usec  
TE 298.0 K  
DC 2.00000000 sec  
TDO -  
SFO1 399.9331994 MHz  
NUC1 13  
PC 3.32 usec  
PL 9.95 usec  
PLW1 6.30000000 W

F2 - Processing parameters  
SI 65536  
SF 399.9300072 MHz  
WDW EM  
SSB 0  
LB 0.30 Hz  
GB 0  
PC 1.00

Israk-ul-Haq/ Dr Khalid/ IUH-I-141a/ DMSO  
<sup>1</sup>H-NMR

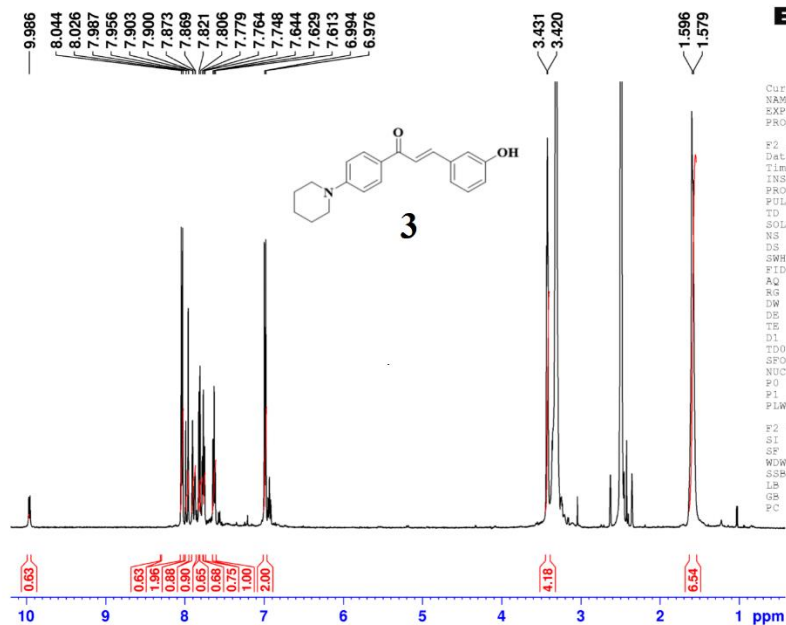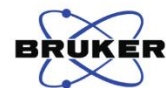

Current Data Parameters  
NAME Dec28-20  
EXPNO 6  
PROCNO 1

F2 - Acquisition Parameters  
Date\_ 20201228  
Time 12:57 h  
INSTRUM Avance Neo 500  
PROBHD Z8107\_0198 (PH  
PULPROG zg30  
TD 32768  
SOLVENT DMSO  
NS 128  
DS 0  
SWH 10000.000 Hz  
FIDRES 0.610352 Hz  
AQ 1.6384000 sec  
RG 101  
DW 50.000 usec  
DE 6.50 usec  
TE 298.0 K  
D1 1.50000000 sec  
TD0 1  
SFO1 500.3340026 MHz  
NUC1 1H  
P0 3.33 usec  
P1 10.00 usec  
PLW1 10.00000000 W

F2 - Processing parameters  
SI 16384  
SF 500.3300090 MHz  
WDW EM  
SSB 0  
LB 0.30 Hz  
GB 0  
PC 1.00

Israr-ul-Haq/ Dr Khalid/ IUH-I-127a/ DMSO  
<sup>1</sup>H

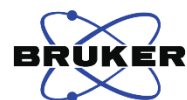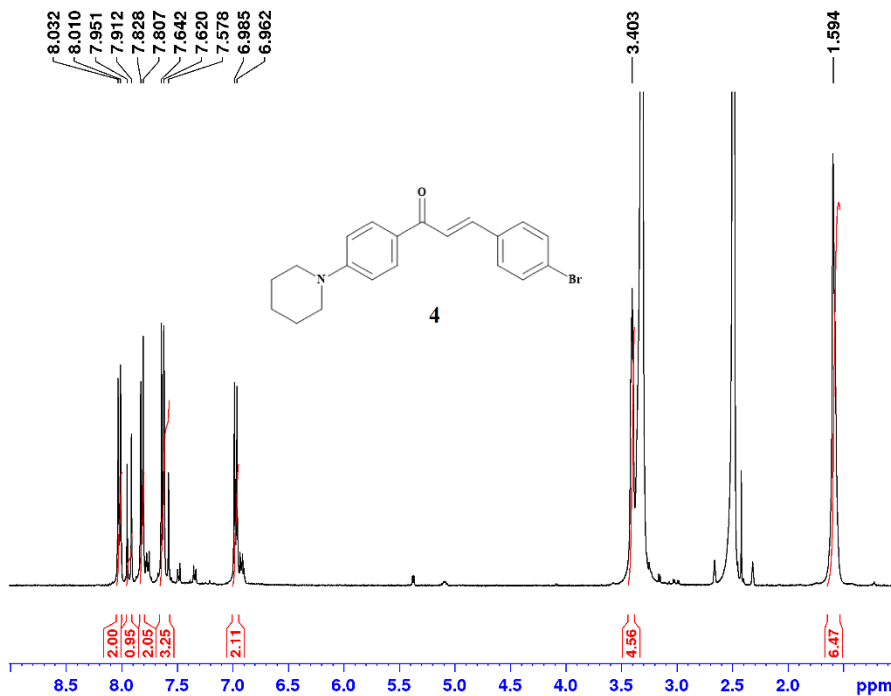

Current Data Parameters  
NAME dec13-20  
EXPNO 8  
PROCNO 1

F2 - Acquisition Parameters  
Date\_ 20201215  
Time 15.10 h  
INSTRUM AVNec\_400  
PROBHD Z8247\_0040 (FH)  
PULPROG zgpg30  
TD 32768  
SOLVENT DMSO  
NS 64  
DS 0  
SWH 7812.500 Hz  
FIDRES 0.476837 Hz  
AQ 2.597520 sec  
RG 101  
DM 64.000 usec  
DE 14.30 usec  
TE 298.0 K  
CL 2.00000000 sec  
TDO 1  
SFOL 399.9331994 MHz  
NUC1 1H  
PC 3.32 usec  
PI 9.95 usec  
PLWL 6.00000000 W

F2 - Processing parameters  
SI 65536  
SF 399.9300071 MHz  
WDW EM  
SSB 0  
LB 0.30 Hz  
GB 0  
PC 1.00

Israr-ul-Haq/ Dr Khalid/ IUH-I-95a/ DMSO  
1H-NMR

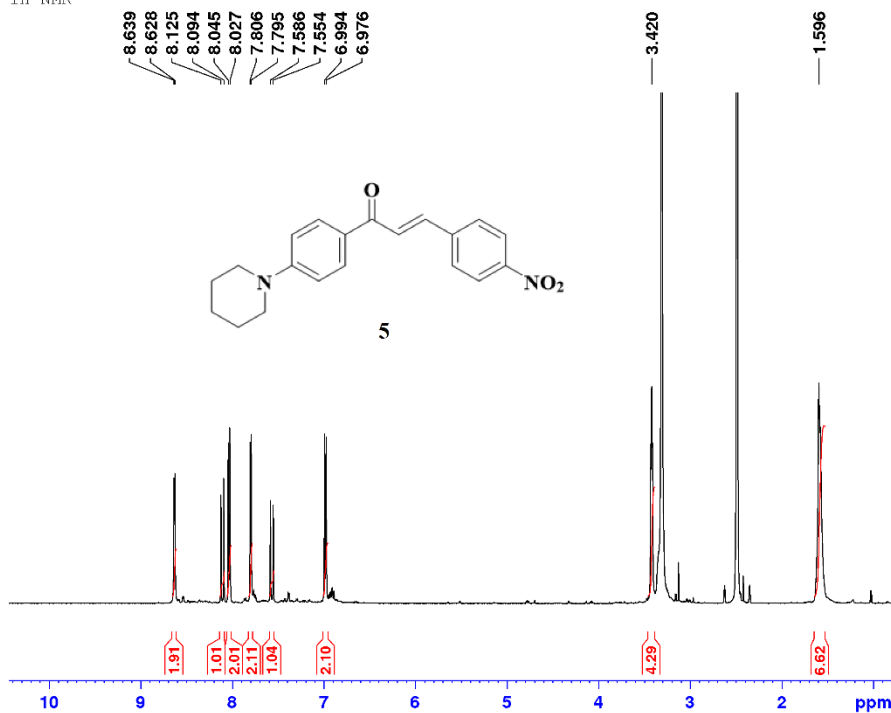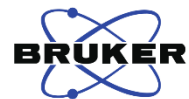

Current Data Parameters  
NAME Dec28-20  
EXPNO 5  
PROCNO 1

F2 - Acquisition Parameters  
Date\_ 20201228  
Time 12.41 h  
INSTRUM Avance Neo 500  
PROBHD zgpg301 (2H)  
PULPROG zgpg30  
TD 32768  
SOLVENT DMSO  
NS 64  
DS 0  
SWH 10000.000 Hz  
FIDRES 0.610352 Hz  
AQ 1.6384000 sec  
RG 101  
EW 50.000 usec  
DE 6.50 usec  
TE 298.0 K  
D1 1.50000000 sec  
TD0 1  
SFO1 500.3340026 MHz  
NUC1 1H  
P0 3.33 usec  
PC 10.00 usec  
PLW1 10.00000000 W

F2 - Processing parameters  
SI 16384  
SF 500.3340026 MHz  
WDW EM  
SSB 0  
LB 0.30 Hz  
GB 0  
PC 1.00

Israr-ul-Haq/ Dr Khalid/ IUH-I-107a/ DMSO  
<sup>1</sup>H-NMR

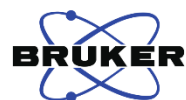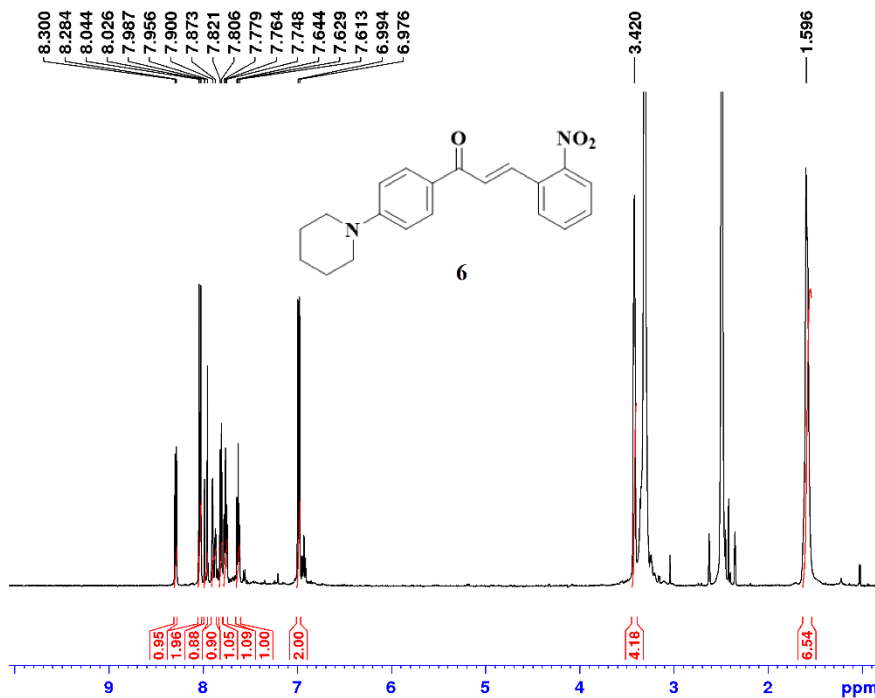

Current Data Parameters  
NAME Dec28-20  
EXPNO 6  
PROCNO 1

F2 - Acquisition Parameters  
Date\_ 20201228  
Time 12.57 h  
INSTRUM Avance Neo 500  
PROBHD 28107\_0198 (PH  
PULPROG zg30  
TD 32768  
SOLVENT DMSO  
NS 128  
DS 0  
SWE 10000.000 Hz  
FIDRES 0.610352 Hz  
AQ 1.6384000 sec  
RG 101  
DW 50.000 usec  
DE 6.50 usec  
TE 298.0 K  
D0 1.50000000 sec  
C00  
SFO1 500.3340026 MHz  
NUC1 1H  
P0 3.33 usec  
PL 10.00 usec  
PLW1 10.00000000 W

F2 - Processing parameters  
SI 16384  
SF 500.3300090 MHz  
WDW EM  
SSB 0  
LB 0  
GB 0  
PC 1.00

Israr-ul-Haq/ Dr Khalid/ IUH-I-155a/ DMSO  
 1H-NMR

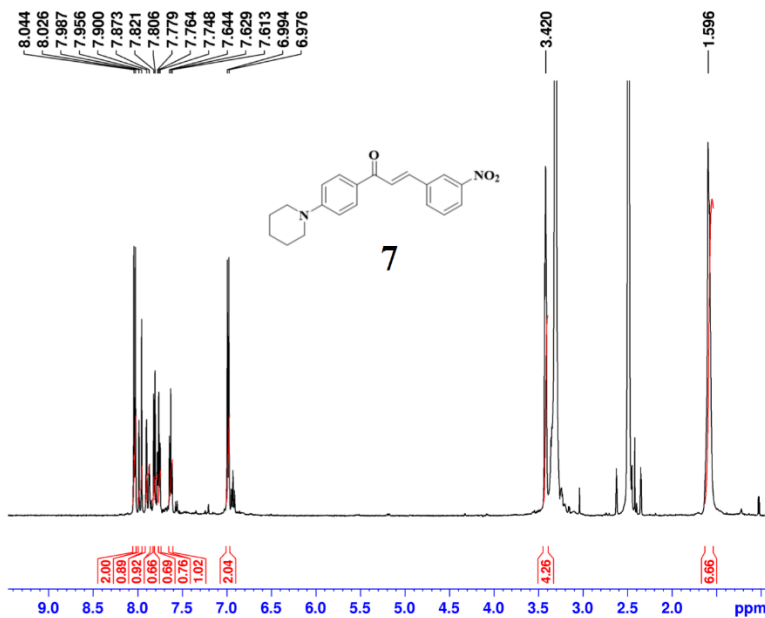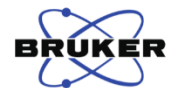

Current Data Parameters  
 NAME Dec28-20  
 EXPNO 6  
 PROCNO 1

F2 - Acquisition Parameters  
 Date\_ 20201228  
 Time 12:57 h  
 INSTRUM Avance Neo 500  
 PROBRD Z8107\_0198 (P4)  
 PULPROG zg30  
 TD 32768  
 SOLVENT DMSO  
 NS 128  
 DS 0  
 SWH 10000.000 Hz  
 FIDRES 0.410352 Hz  
 AQ 1.6384000 sec  
 RG 101  
 DW 50.000 usec  
 DE 6.50 usec  
 TE 298.0 K  
 D1 1.50000000 sec  
 TDO 1  
 SFO1 500.3340026 MHz  
 NUC1 1H  
 P0 3.33 usec  
 P1 10.00 usec  
 PLW1 10.00000000 W

F2 - Processing parameters  
 SI 16384  
 SF 500.3300090 MHz  
 WDW EM  
 SSB 0  
 LB 0.30 Hz  
 GB 0  
 PC 1.00

Israr-ul-Haq/ Dr Khalid/ IUH-I-161a/ DMSO  
 1H-NMR

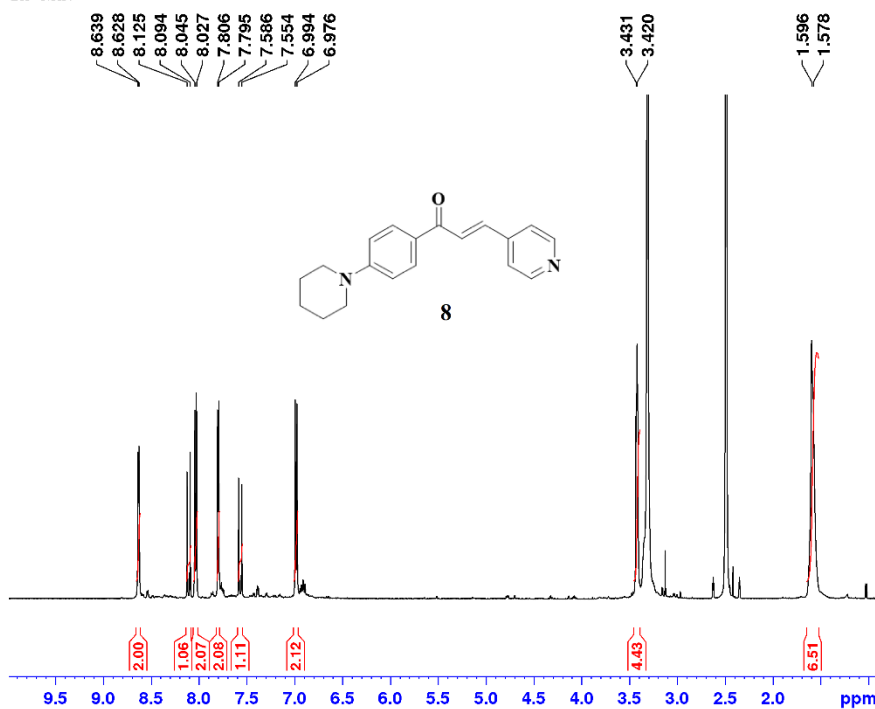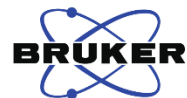

Current Data Parameters  
 NAME Dec28-20  
 EXPNO 5  
 PROCNO 1

F2 - Acquisition Parameters  
 Date\_ 20201228  
 Time 12.41 h  
 INSTRUM Avance Neo 500  
 PROBHD zgpg30 (PH)  
 PULPROG zgpg30  
 TD 32768  
 SOLVENT DMSO  
 NS 64  
 DS 4  
 SWH 10000.000 Hz  
 FIDRES 0.610352 Hz  
 AQ 1.6384000 sec  
 RG 101  
 DW 50.000 usec  
 DE 6.50 usec  
 TE 298.0 K  
 D1 1.5000000 sec  
 IDC 1  
 SPOL 500.3340026 MHz  
 NUCL1 1H  
 PC 3.33 usec  
 P1 10.00 usec  
 PL1 10.0000000 W

F2 - Processing parameters  
 SI 16384  
 SF 500.3300090 MHz  
 WDW EM  
 SSB 0  
 LB 0.30 Hz  
 GB 0  
 PC 1.00



Israr-ul-Haq/ Dr Khalid/ IUH-I-143a/ DMSO  
1H

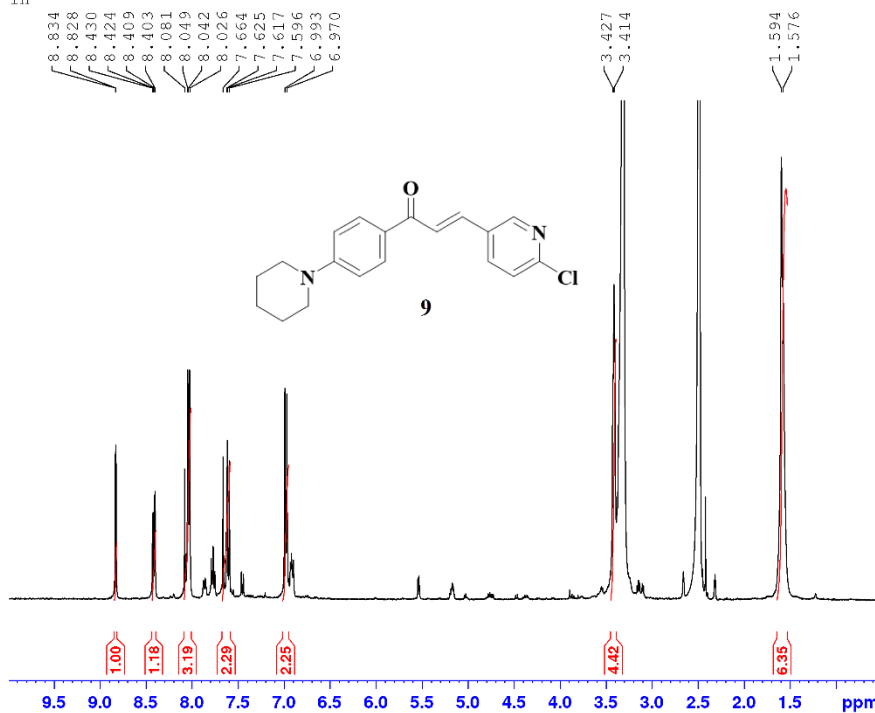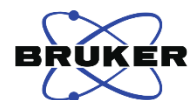

Current Data Parameters  
NAME dec15-20  
EXPNO 7  
PROCNO 1

F2 - Acquisition Parameters  
Date\_ 20201215  
Time 15.01 h  
INSTRUM AVNec\_400  
PROBHD zgpg30 (PF)  
PULPROG zg30  
ID 32788  
SOLVENT DMSO  
NS 64  
DS 5  
SWH 7812.500 Hz  
FIDRES 0.476837 Hz  
AQ 2.0971520 sec  
RG 1.01  
CW 64.500 usec  
DT 14.30 usec  
TE 298.0 K  
D1 2.30000000 sec  
TDC 1  
SFOL 399.9330994 MHz  
NUC1 1H  
PC 3.32 usec  
P1 9.95 usec  
PLW1 6.00000000 W

F2 - Processing parameters  
SI 65536  
SF 399.9330071 MHz  
WDW EM  
SSB 0  
LB 0.30 Hz  
GB 0  
PC 1.00

Israr-ul-Haq/ Dr Khalid/ IUH-I-163a/ DMSO  
<sup>1</sup>H-NMR

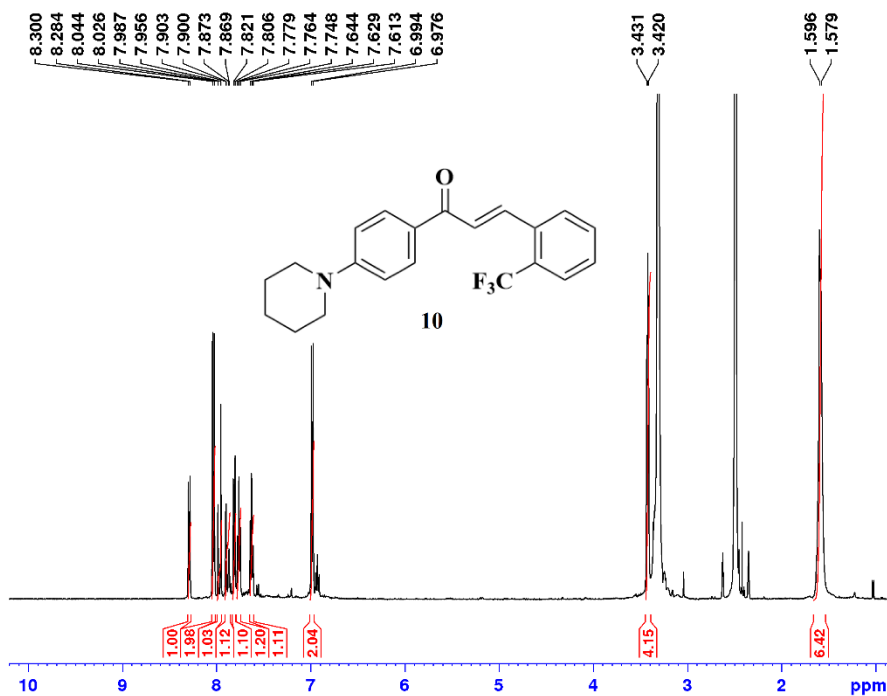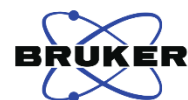

Current Data Parameters  
NAME Dec28-20  
EXPNO 6  
PROCNO 1

F2 - Acquisition Parameters  
Date\_ 20201228  
Time 12.57 h  
INSTRUM Avance Neo 500  
PROBHD Z8107\_0198 (PA  
PULPROG zgpg  
TD 32768  
SOLVENT DMSO  
NS 128  
DS 0  
SWH 10000.000 Hz  
FIDRES 0.610352 Hz  
AQ 1.6384000 sec  
RG 101  
DW 50.000 usec  
DE 6.50 usec  
TE 298.0 K  
D1 1.50000000 sec  
TD0 1  
SFO1 500.3340026 MHz  
NUC1 1H  
FO 3.33 usec  
PC 10.00 usec  
PLW1 10.00000000 W

F2 - Processing parameters  
SI 16384  
SF 500.3300090 MHz  
WDW EM  
SSB 0  
LB 0.30 Hz  
GB 0  
PC 1.00

Israr-ul-Haq/ Dr Khalid/ IUH-I-93a/ DMSO  
1H-NMR

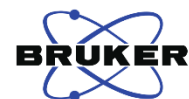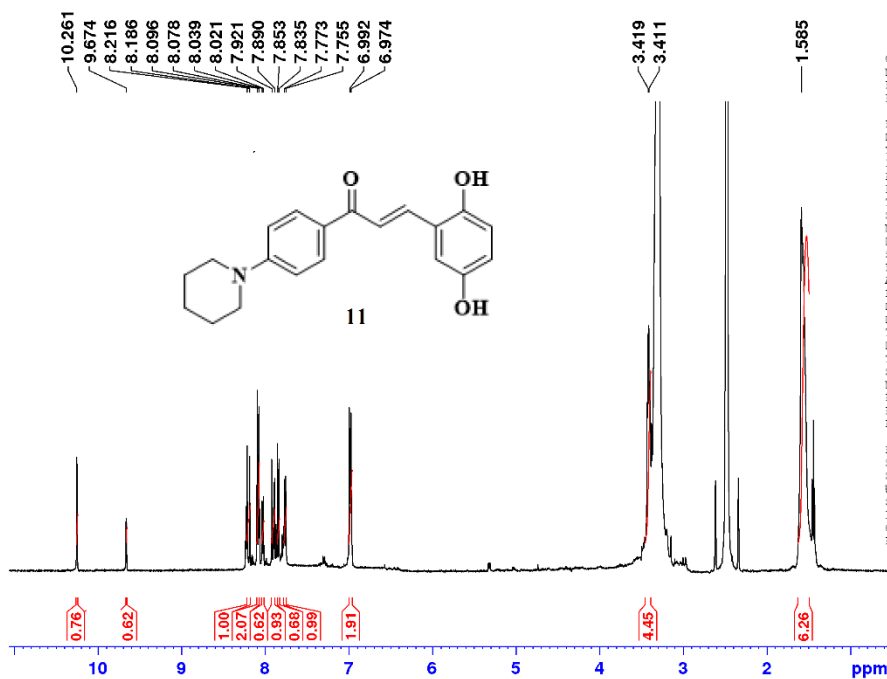

Current Data Parameters  
NAME Dec08-20  
EXPNO 2  
PROCNO 1

F2 - Acquisition Parameters  
Date\_ 20201208  
Time 15.16 h  
INSTRUM Avance Neo 500  
PROBHD zg30  
PULPROG zg30  
TD 32768  
SOLVENT DMSO  
NS 128  
DS 0  
SWH 10000.000 Hz  
FIDRES 0.610352 Hz  
AQ 1.6384000 sec  
RG 101  
DW 50.000 usec  
DE 6.50 usec  
TE 298.0 K  
D1 1.50000000 sec  
ZD0 -  
SFO1 500.3340026 MHz  
NUC1 1H  
P0 3.33 usec  
P1 10.00 usec  
PLW1 10.00000000 W

F2 - Processing parameters  
SI 16384  
SF 500.3300145 MHz  
WDW EM  
SSB 0  
LB 0.30 Hz  
GB 0  
PC 1.00

Israr-ul-Haq/ Dr Khalid/ IUH-I-105a/ DMSO  
1H-NMR

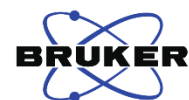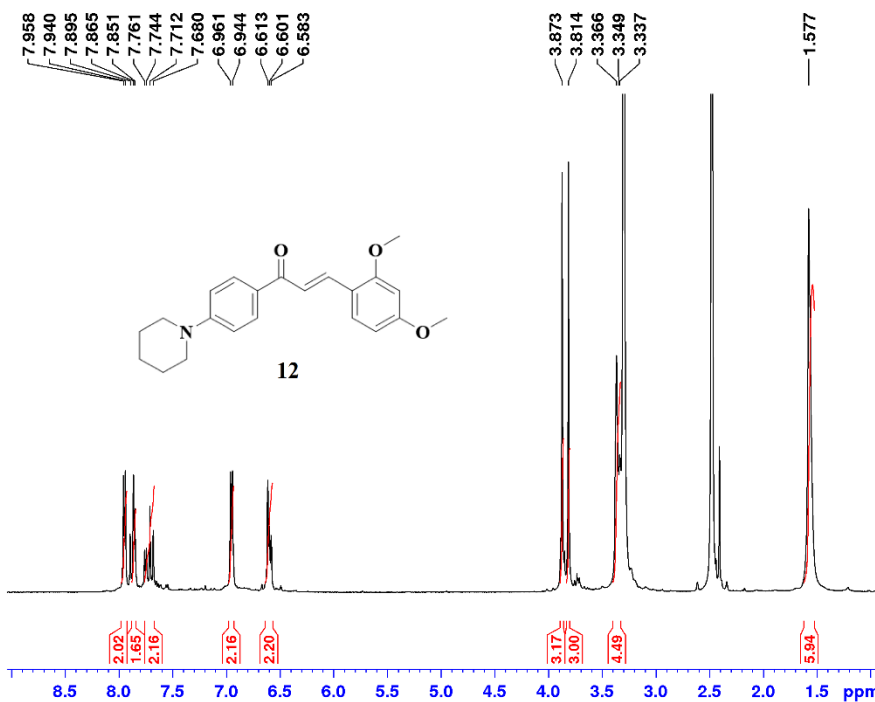

Current Data Parameters  
NAME Dec08-20  
EXPNO 3  
PROCNO 1

F2 - Acquisition Parameters  
Date\_ 20201208  
Time 15.31 h  
INSTRUM Avance Neo 500  
PROBHD 28107\_0198 (PH  
PULPROG zg30  
TD 32768  
SOLVENT DMSO  
NS 64  
DS 0  
SWE 10000.000 Hz  
FIDRES 0.610352 Hz  
AQ 1.6384000 sec  
RG 101  
DW 50.000 usec  
DE 6.50 usec  
TE 298.0 K  
D 1.50000000 sec  
CDO 1  
SFO1 500.3340026 MHz  
NUC1 1H  
P0 3.33 usec  
P1 10.00 usec  
PLW1 10.00000000 W

F2 - Processing parameters  
SI 16384  
SF 500.3300145 MHz  
WDW EM  
SS 0  
LB 0.30 Hz  
GB 0  
PC 1.00

Israr/ Dr Khalid/ IUH-I-89a/ DMSO  
 1H  
 300K

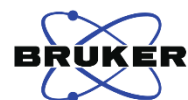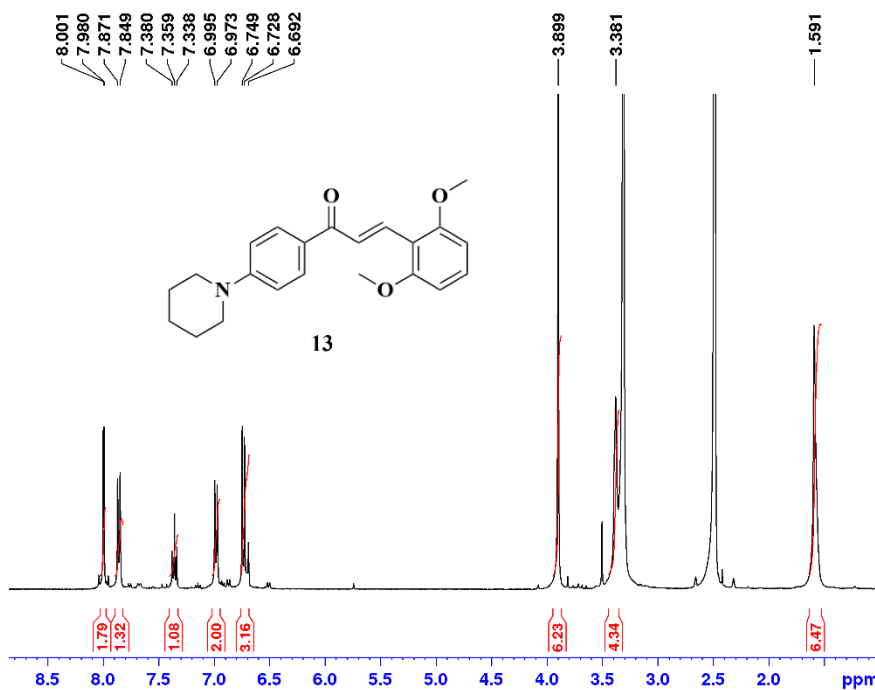

Current Data Parameters  
 NAME Dec03-26  
 EXPNO 8  
 PROCNO 1

F2 - Acquisition Parameters  
 Date\_ 20251203  
 Time 12.44 h  
 INSTRUM AVNeo\_400  
 PROBED 28247\_C04C (24)  
 PULPROG zg30  
 TD 32768  
 SOLVENT DMSO  
 NS 64  
 DS 0  
 SWH 7812.500 Hz  
 FIDRES 0.476837 Hz  
 AQ 2.0971520 sec  
 RG 101  
 DW 64.000 usec  
 DE 14.30 usec  
 TE 298.0 K  
 D1 1.50000000 sec  
 CDO  
 SFO1 399.9331994 MHz  
 NUC1 1H  
 P0 3.32 usec  
 PL 9.95 usec  
 PLW1 6.00000000 W

F2 - Processing parameters  
 SI 65536  
 SF 399.9300070 MHz  
 NMR EH  
 SSB 0  
 LB 0.30 Hz  
 GB 0  
 PC 1.00

Israr-ul-Haq/ Dr Khalid/ IUH-I-149a/ DMSO  
<sup>1</sup>H-NMR

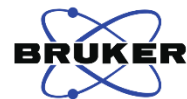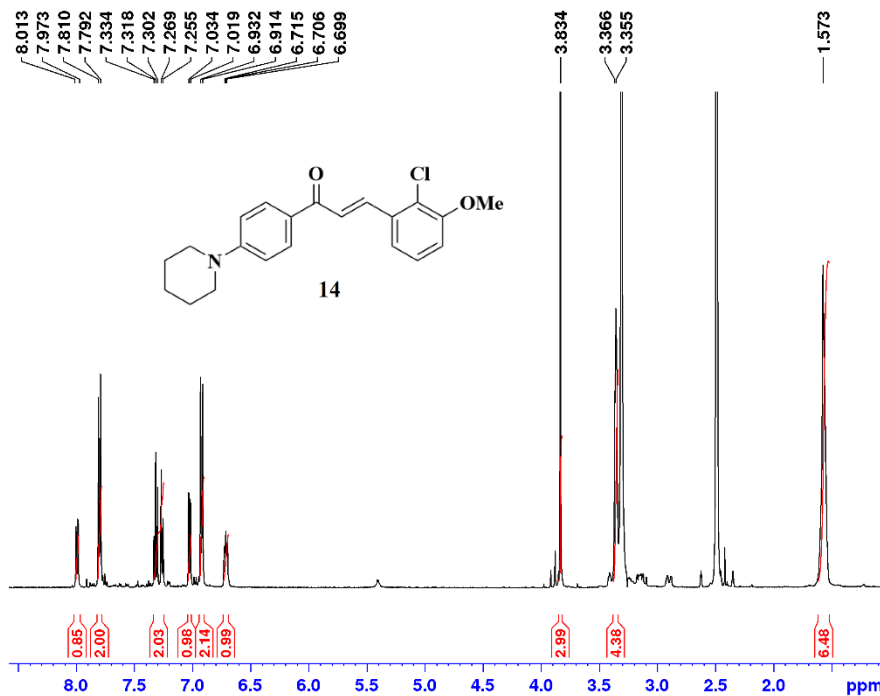

Current Data Parameters  
NAME Dec28-20  
EXPNO 3  
PROCNO 1

F2 - Acquisition Parameters  
Date\_ 20201228  
Time 12.04 h  
INSTRUM Avance Neo 500  
PROBHD ZS107\_0.198 (PH  
PULPROG zgpg30  
TD 32768  
SOLVENT DMSO  
NS 64  
DS 0  
SWH 10000.000 Hz  
FIDRES 0.610352 Hz  
AQ 1.6384000 sec  
RG 101  
CW 50.000 usec  
DE 6.50 usec  
TE 298.2 K  
D1 1.50000000 sec  
TDC 1  
SFO1 500.1340026 MHz  
NUC1 1H  
PC 3.13 usec  
P1 10.00 usec  
PLWL 10.0000000 W

F2 - Processing parameters  
SI 16384  
SF 500.1340026 MHz  
WDW EM  
SSB 0  
LB 0.30 Hz  
GB 0  
PC 1.00

Faiza Saleem/Dr,Khalid/FAS-I-135a/Dmsd/  
 1H  
 300K

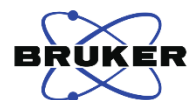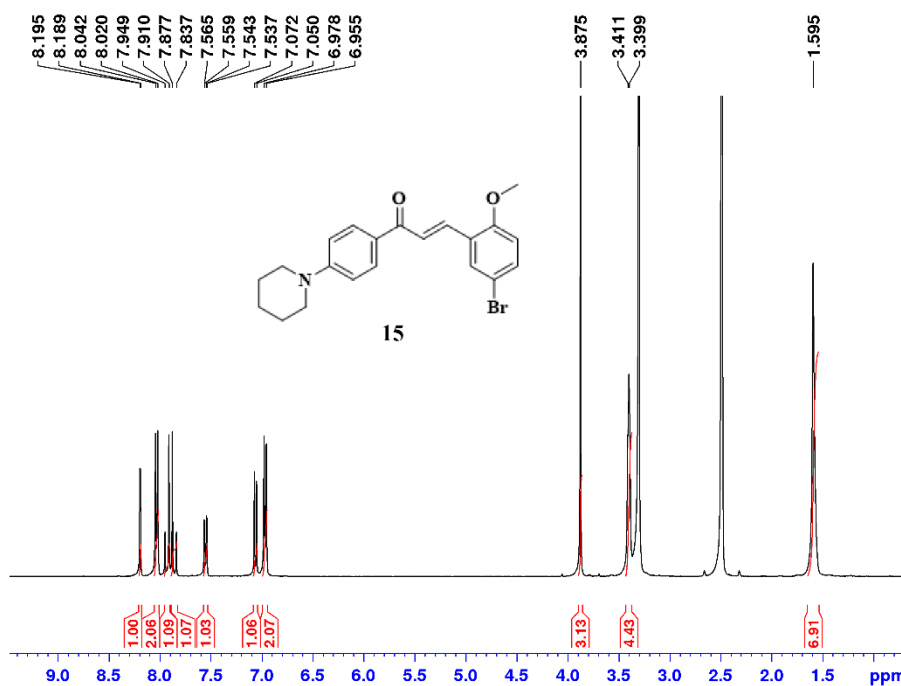

Current Data Parameters  
 NAME Oct23-20  
 EXPNO 3  
 PROCNO 1

F2 - Acquisition Parameters  
 Date\_ 20201023  
 Time 15.32 h  
 INSTRUM AVNeo\_400  
 PROBRD Z8247\_0040 (PE  
 PULPROG zgpg  
 TD 32768  
 SOLVENT DMSO  
 NS 32  
 DS 0  
 SWH 7812.500 Hz  
 FIDRES 0.476837 Hz  
 AQ 2.0971520 sec  
 RG 101  
 DM 64.000 usec  
 DE 14.30 usec  
 TE 300.0 K  
 D1 2.00000000 sec  
 TDC 1  
 STOC 399.9331994 MHz  
 NUC1 1H  
 PC 3.32 usec  
 P1 8.95 usec  
 PL1 6.00000000 W

F2 - Processing parameters  
 SI 65536  
 SF 399.9300371 MHz  
 WDW EM  
 SSB 0  
 LB 0.30 Hz  
 GB 0  
 PC 1.00

ISRARUL HAQ/DR.KHALID/IUH-I-97a/DMSO  
B.B

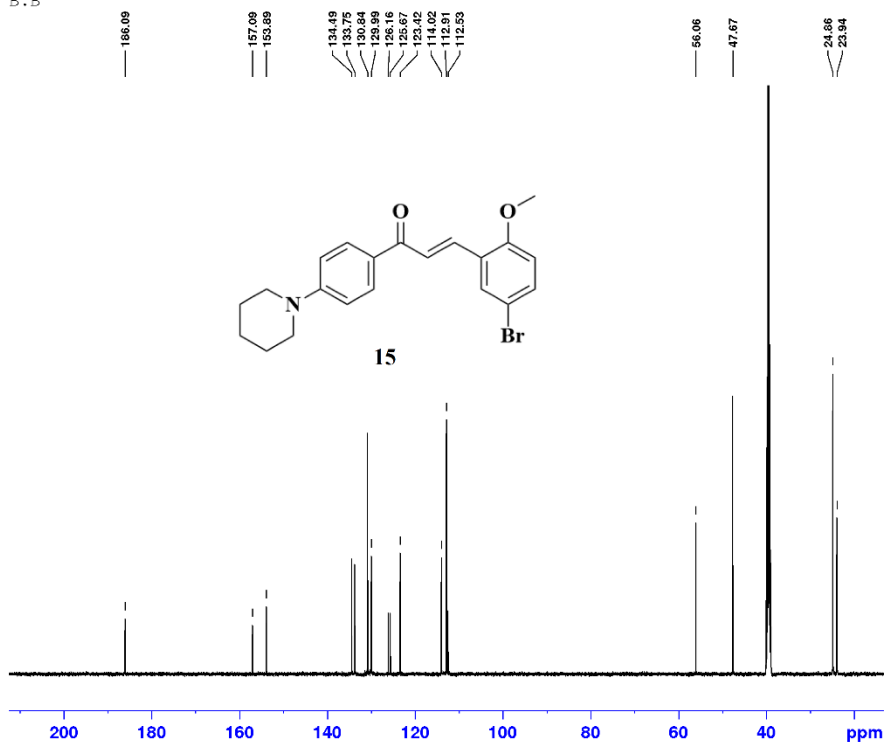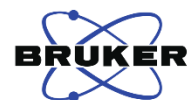

Current Data Parameters  
NAME Dec24-20  
EXPNO 4  
PROCNO 1

F2 - Acquisition Parameters  
Date\_ 20201225  
Time 5.41 h  
INSTRUM AVNeo500MHz  
PROBHD Z859201\_0007 (   
PULPROG zgpg  
TD 32768  
SOLVENT DMSO  
NS 18432  
DS 4  
SWH 30120.482 Hz  
FIDRES 1.839408 Hz  
AQ 0.5439488 sec  
RG 101  
DW 16.500 usec  
DE 5.50 usec  
TE 298.2 K  
D1 2.00000000 sec  
D11 0.03000000 sec  
TDC 18  
SFOL 125.7722507 MHz  
NUCL 13C  
P1 15.00 usec  
PLW1 119.40000153 W  
SFO2 500.1320005 MHz  
NUC2 1H  
CPDPRG2 waltz165  
PCPD2 80.00 usec  
PLW2 17.96400070 W  
PLW3 0.13754000 W  
PLW4 0.06918100 W

F2 - Processing parameters  
SI 32768  
SF 125.7578513 MHz  
WDW EM  
SSB C  
LB 1.00 Hz  
GB C  
PC 1.40



Israr-ul-Haq/ Dr Khalid/ IUH-I-93a/ DMSO  
<sup>1</sup>H-NMR

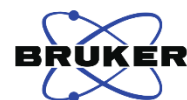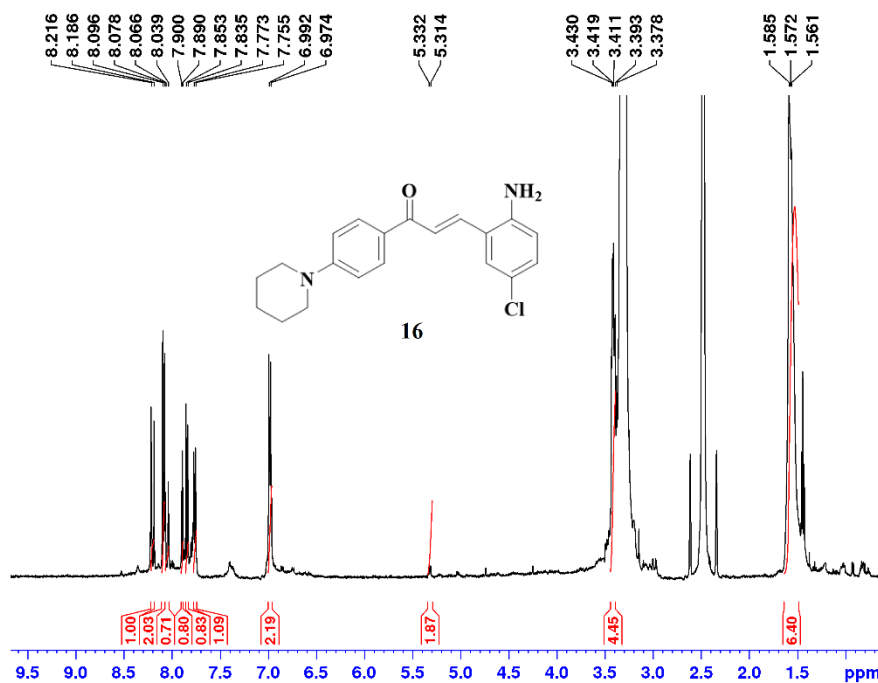

Current Data Parameters  
NAME Dec08-20  
EXPNO 2  
PROCNO 1

F2 - Acquisition Parameters  
Date\_ 20201208  
Time 15.16 h  
INSTRUM Avance Neo 500  
PROBHD 28107\_0198 (2H)  
PULPROG zg30  
TD 32768  
SOLVENT DMSO  
NS 128  
DS 0  
SWH 10000.000 Hz  
FIDRES 0.610352 Hz  
AQ 1.6384000 sec  
RG 101  
DM 50.000 usec  
DE 6.50 usec  
TE 298.0 K  
D1 1.50000000 sec  
CDO 1  
SFO1 500.3340026 MHz  
NUC1 1H  
P0 3.33 usec  
P1 10.00 usec  
PLW1 10.00000000 W

F2 - Processing parameters  
SI 16384  
SF 500.3300145 MHz  
WDW EM  
SSB 0  
LB 0.30 Hz  
GB 0  
PC 1.00

Israr-ul-Haq/ Dr Khalid/ IUH-I-101a/ DMSO  
<sup>1</sup>H-NMR

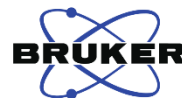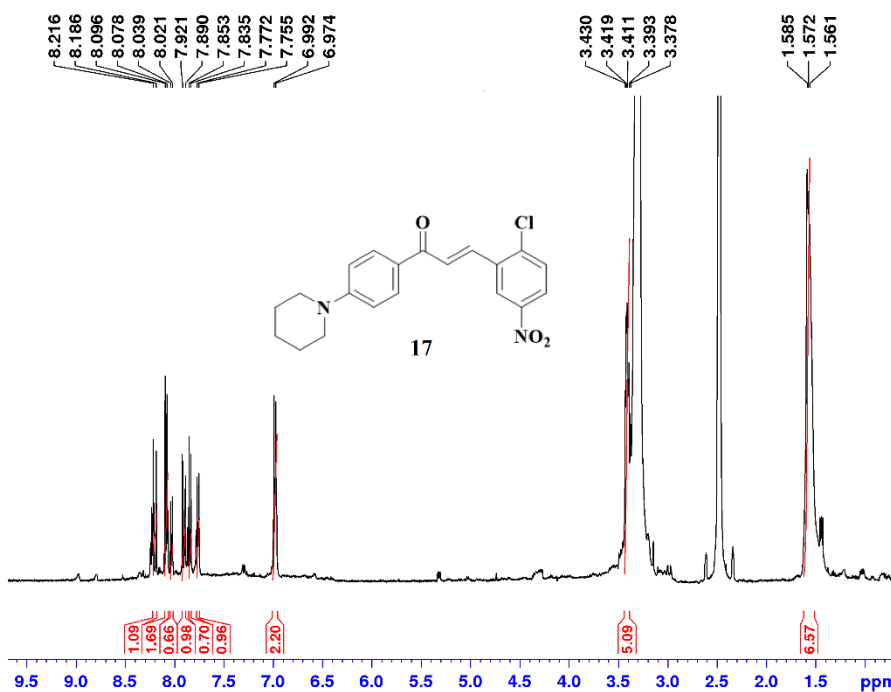

Current Data Parameters  
NAME Dec08-20  
EXFNO 2  
PROCNO 1

F2 - Acquisition Parameters  
Date\_ 20201208  
Time 15.16 h  
INSTRUM Avance Neo 500  
PROBHD zgpg30 (PH  
PULPROG zgpg30  
TD 32768  
SOLVENT DMSO  
NS 128  
DS 4  
SWH 10000.000 Hz  
FIDRES 0.610352 Hz  
AQ 1.6384000 sec  
RG 101  
DW 50.000 usec  
DE 6.50 usec  
TE 298.0 K  
D1 1.50000000 sec  
TDC 1  
SFOL 500.3340026 MHz  
NUCL 1H  
PC 3.33 usec  
PL 10.00 usec  
PLWL 10.00000000 W

F2 - Processing parameters  
SI 16384  
SF 500.330145 MHz  
WDW EM  
SSB 0  
LB 0.30 Hz  
GB 0  
PC 1.00

Israr-ul-Haq/ Dr Khalid/ IUH-I-117a/ DMSO  
<sup>1</sup>H

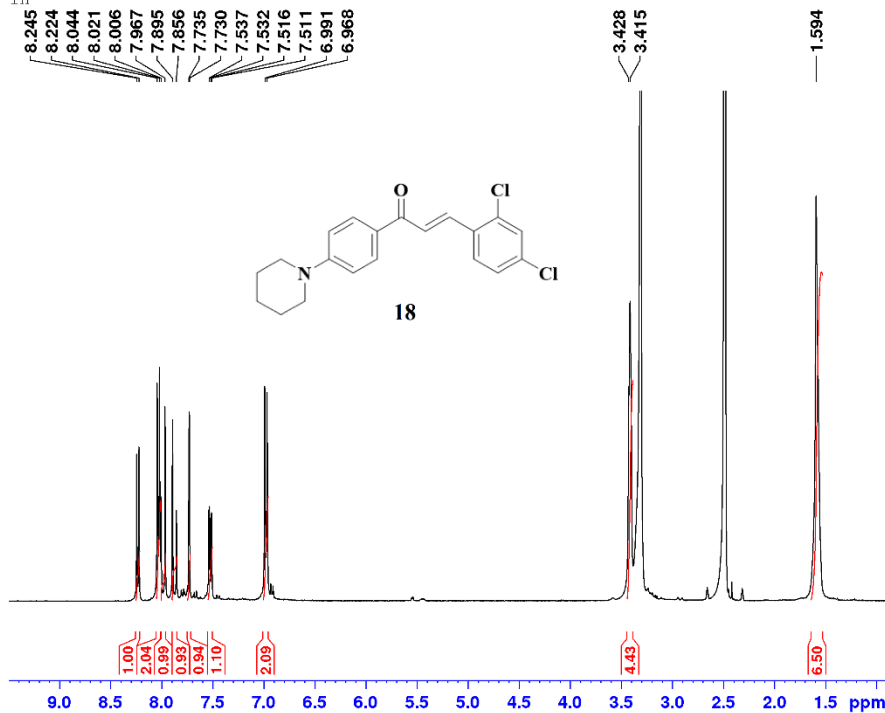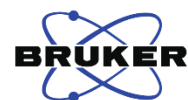

Current Data Parameters  
NAME dec15-20  
EXPNO 6  
PROCNO 1

F2 - Acquisition Parameters  
Date\_ 20201213  
Time 14.52 h  
INSTRUM AVNec\_400  
PROBHD zgpg30 (2H)  
PULPROG zgpg30  
TD 32768  
SOLVENT DMSO  
NS 64  
DS 0  
SWH 7812.500 Hz  
FIDRES 0.476837 Hz  
AQ 2.0971520 sec  
RG 101  
DW 64.000 usec  
DE 14.30 usec  
TE 298.0 K  
D1 2.0000000 sec  
TD0 1  
SFO1 399.9331994 MHz  
NUC1 1H  
FO 3.32 usec  
PC 9.85 usec  
PLW1 6.0000000 W

F2 - Processing parameters  
SI 65536  
SF 399.9300071 MHz  
WDW EM  
SSB 0  
LB 0.30 Hz  
GB 0  
PC 1.00

Faiza Saleem/Dr,Khalid/FAS-I-145a/Dmsd/  
 1H  
 300K

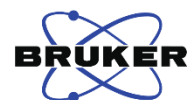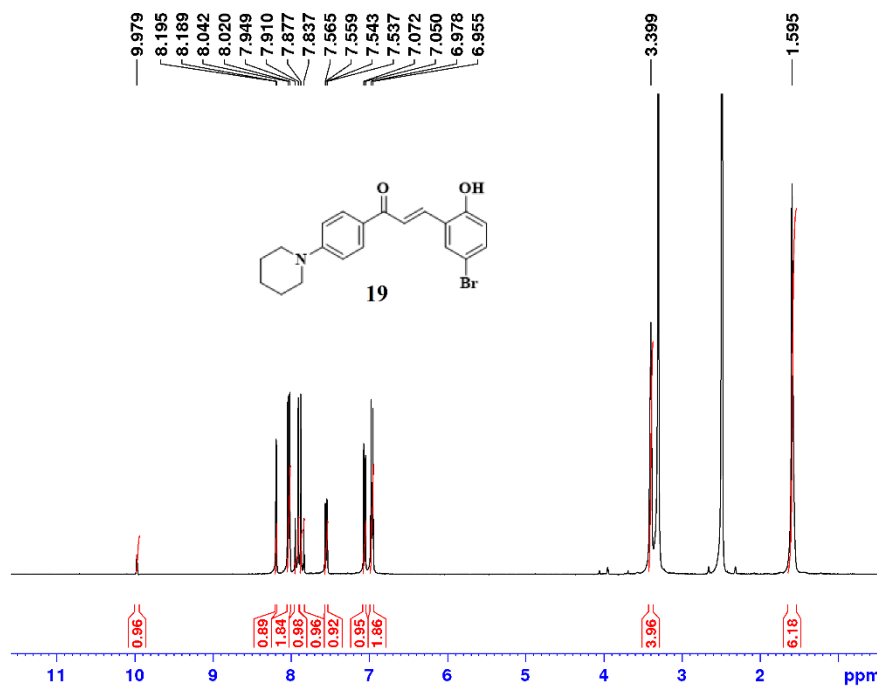

Current Data Parameters  
 NAME Oct23-20  
 EXPNO 8  
 PROCNO 1

F2 - Acquisition Parameters  
 Date\_ 20201023  
 Time 15.32 h  
 INSTRUM AVNec\_400  
 PROBHD 28247\_0040 (PE)  
 PULPROG zg30  
 ID 32768  
 SOLVENT DMSO  
 NS 32  
 DS 4  
 SWH 7812.500 Hz  
 FIDRES 0.476837 Hz  
 AQ 2.0971520 sec  
 RG 600  
 DW 64.000 usec  
 DE 14.30 usec  
 TE 300.0 K  
 D1 2.00000000 sec  
 TDC 1  
 SFO1 399.9331994 MHz  
 NUCL1 1H  
 PC 3.32 usec  
 P1 9.95 usec  
 PLW1 6.00000000 W

F2 - Processing parameters  
 SI 65536  
 SF 399.9330071 MHz  
 WDW EM  
 SSB 0  
 LB 0.30 Hz  
 GB 0  
 PC 1.00

Israr-ul-Haq/ Dr Khalid/ IUH-I-151a/ DMSO  
<sup>1</sup>H-NMR

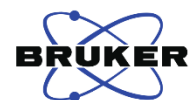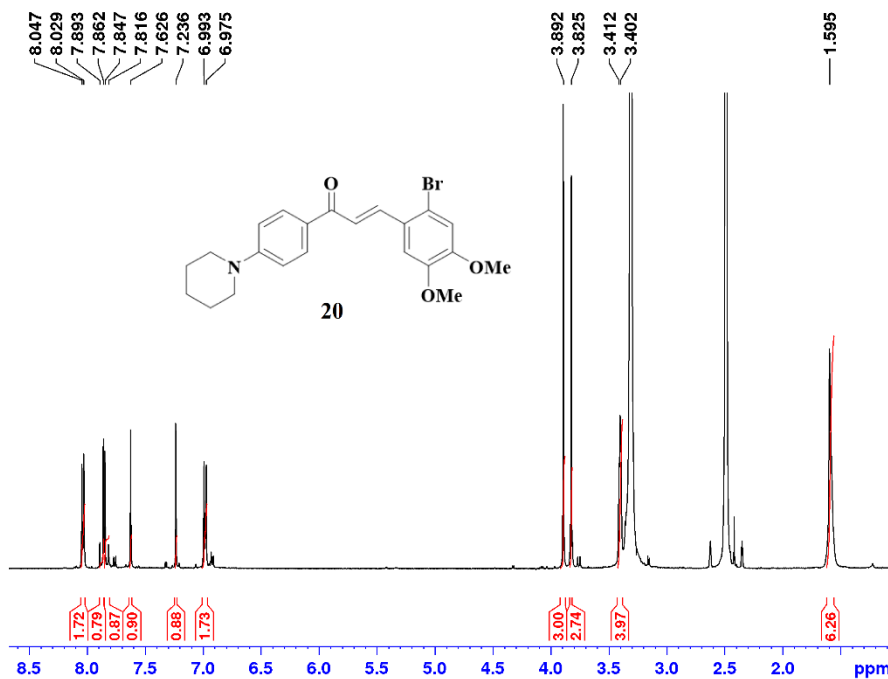

Current Data Parameters  
NAME Dec28-20  
EXPNO 1  
PROCNO 1

F2 - Acquisition Parameters  
Date\_ 20201228  
Time 12.13 h  
INSTRUM Avance Neo 500  
PROBHD zg30  
ID 32768  
SOLVENT DMSO  
NS 64  
DS 2  
SWH 10000.000 Hz  
FIDRES 0.610352 Hz  
AQ 1.6384000 sec  
RG 128  
DW 50.000 usec  
DE 6.50 usec  
TE 298.0 K  
D1 1.5000000 sec  
TD 1  
SFO1 500.3340025 MHz  
NUC1 1H  
PC 3.33 usec  
P1 10.00 usec  
PLW 10.0000000 W

F2 - Processing parameters  
SI 16384  
SF 500.3300090 MHz  
WDW EX  
SSB 0  
LB 0.30 Hz  
GB 0  
PC 1.00

Israr-ul-Haq/ Dr Khalid/ IUH-I-115a/ DMSO  
<sup>1</sup>H-NMR

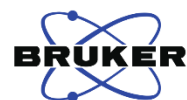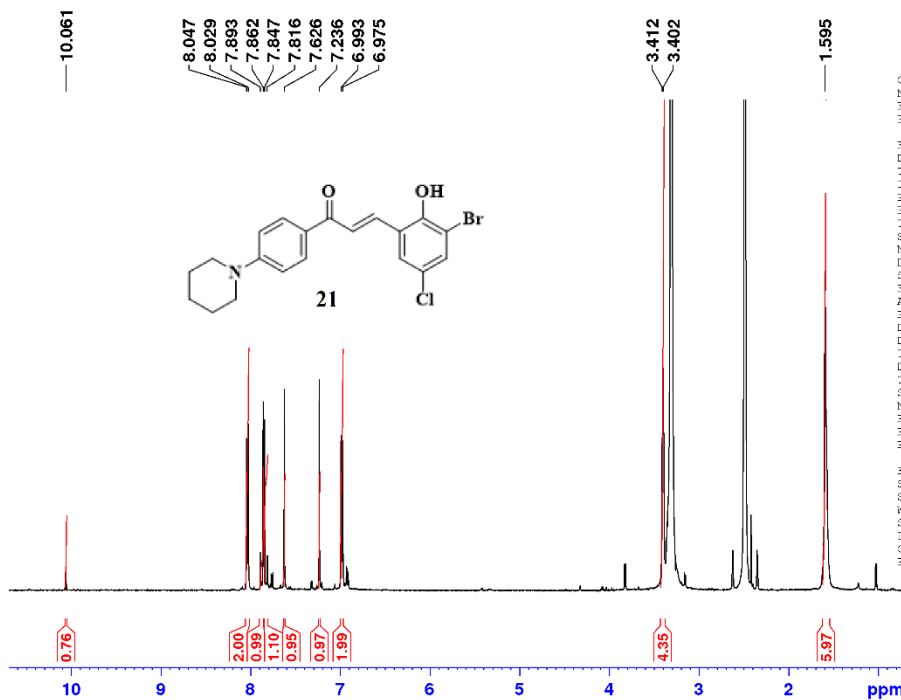

Current Data Parameters  
NAME Dec28-20  
EXPNO 1  
PROCNO 1

F2 - Acquisition Parameters  
Date\_ 20201228  
Time 12.13 h  
INSTRUM Avance Neo 500  
PROBHD zgpg30 (PH)  
PULPROG zgpg30  
TD 32768  
SOLVENT DMSO  
NS 64  
DS 0  
SWE 10000.000 Hz  
FIDRES 0.610352 Hz  
AQ 1.6384000 sec  
RG 101  
DW 50.000 usec  
DE 6.50 usec  
TE 298.0 K  
D1 1.50000000 sec  
D10 -  
SFO1 500.3340026 MHz  
NUC1 1H  
P1 3.33 usec  
PC 10.00 usec  
PLW1 10.00000000 W

F2 - Processing parameters  
SI 16384  
SF 500.3300090 MHz  
WDW EM  
SSB 0  
LB 0.30 Hz  
GB 0  
PC 1.00

Israr-ul-Haq/ Dr Khalid/ IUH-I-125a/ DMSO  
<sup>1</sup>H-NMR

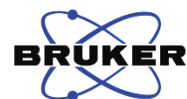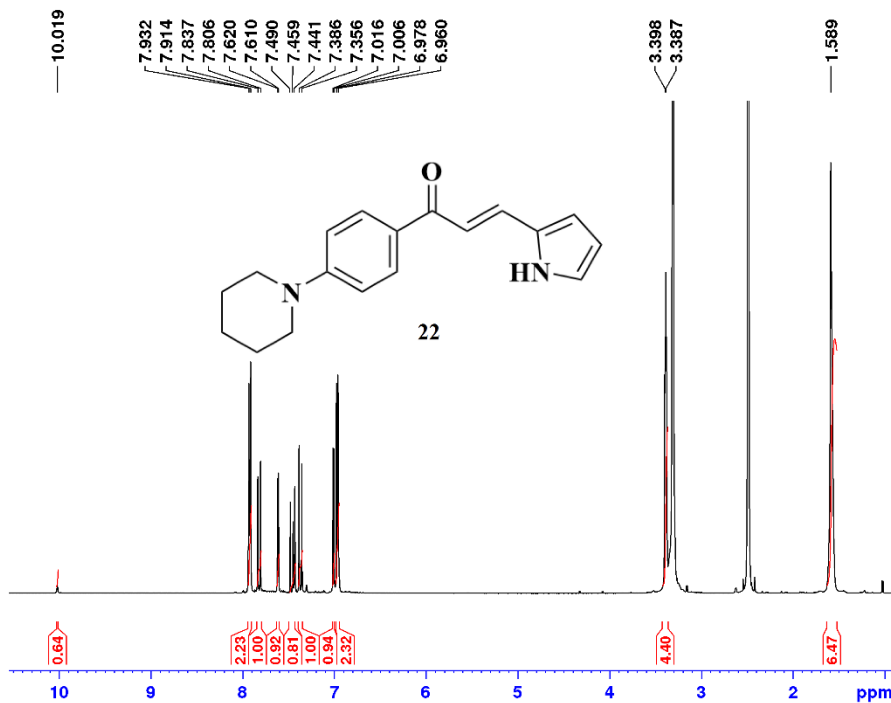

Current Data Parameters  
 NAME: Dec28-20  
 EXPNO: 4  
 PROCNO: 1

F2 - Acquisition Parameters  
 Date\_: 20201228  
 Time: 12.28 h  
 INSTRUM: Avance Neo 500  
 PROBED: 28107\_0198 (PH)  
 PULPROG: zg30  
 TD: 32768  
 SOLVENT: DMSO  
 NS: 128  
 DS: 0  
 SWE: 10000.000 Hz  
 FIDRES: 0.610352 Hz  
 AQ: 1.6384000 sec  
 RG: 101  
 DW: 50.000 usec  
 DE: 6.50 usec  
 TE: 298.0 K  
 D0: 1.50000000 sec  
 L0: 1  
 SFO1: 500.3340026 MHz  
 NUCL1: 1H  
 P0: 3.33 usec  
 PL: 10.00 usec  
 PLW1: 10.00000000 W

F2 - Processing parameters  
 SI: 16384  
 SF: 500.3300090 MHz  
 WDW: EM  
 SSB: 0  
 LB: 0.30 Hz  
 GB: 0  
 PC: 1.00

Israr-ul-Haq/ Dr Khalid/ IUH-I-133a/ DMSO  
1H-NMR

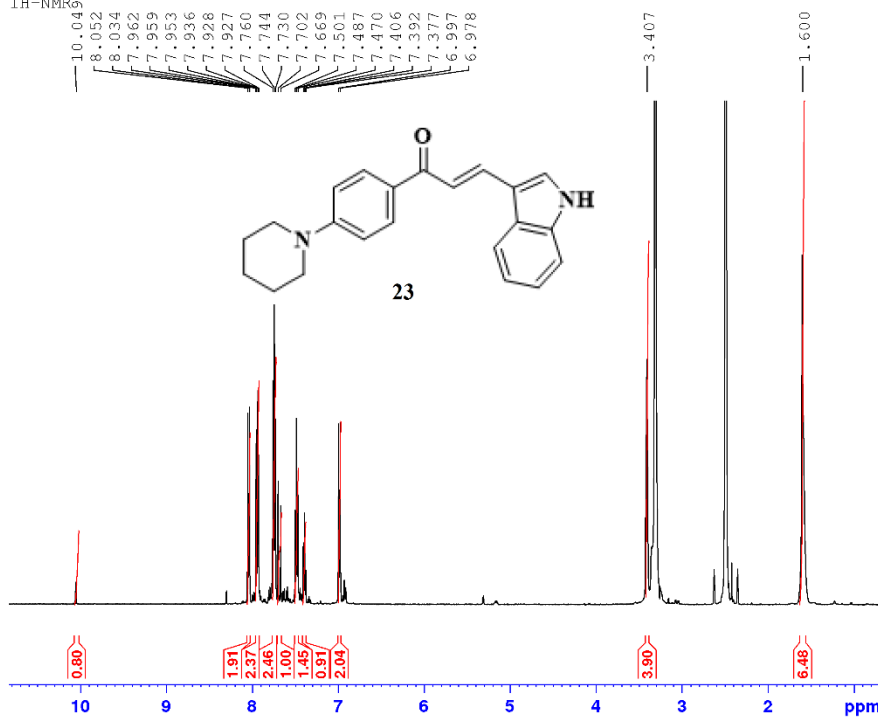

Current Data Parameters  
NAME Dec24-2023  
EXPNO 5  
PROCNO 1

F2 - Acquisition Parameters  
Date\_ 20201224  
Time 16.06 h  
INSTRUM Avance Neo 500  
PROBHD Z8LC7\_C198 (PE  
PULPROG zgpg30  
TD 32768  
SOLVENT DMSO  
NS 128  
DS 0  
SWH 10000.000 Hz  
FIDRES 0.610352 Hz  
AQ 1.6384000 sec  
RG 101  
DM 50.000 usec  
DE 6.50 usec  
TE 298.2 K  
D1 1.50000000 sec  
TDC 1  
SFO1 500.3340026 MHz  
NUC1 1H  
PC 3.33 usec  
PI 10.00 usec  
PL1 10.0000000 W

F2 - Processing parameters  
SI 6384  
SF 500.3300090 MHz  
WDW EM  
SSB 0  
LB 0.30 Hz  
GB 0  
PC 1.00



Israr-ul-Haq/ Dr Khalid/ IUH-I-131a/ DMSO  
1H-NMR

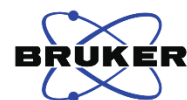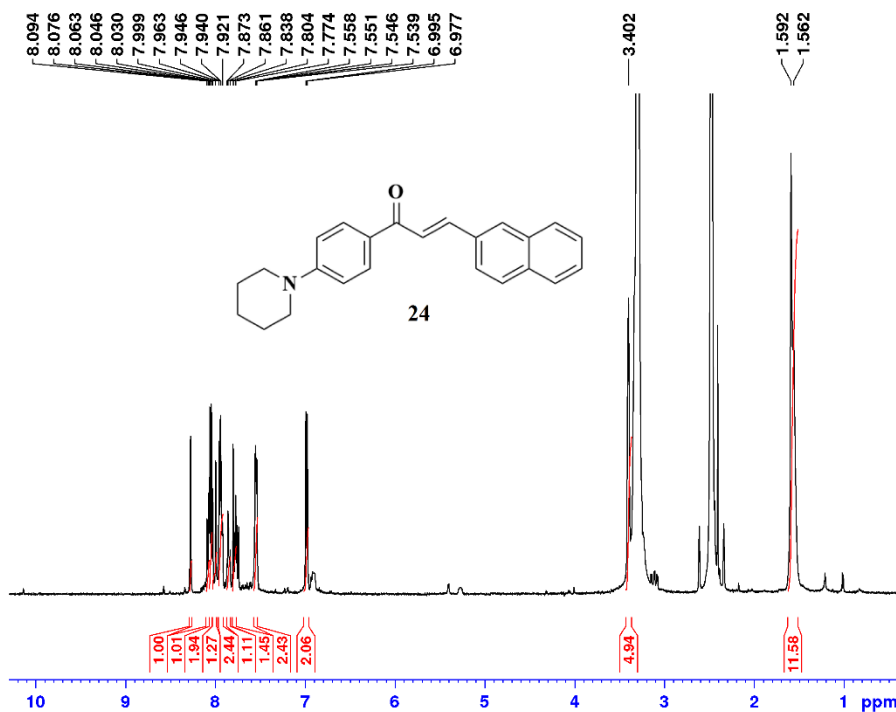

Current Data Parameters  
NAME Dec08-20  
EXPNO 4  
PROCNO 1

F2 - Acquisition Parameters  
Date\_ 20201208  
Time 15.48 h  
INSTRUM Avance Neo 500  
PROBHD ZB107\_0198 (2H  
PULPROG zgpg30  
TD 32768  
SOLVENT DMSO  
NS 64  
DS 0  
SWE 10000.000 Hz  
FIDRES 0.610352 Hz  
AQ 1.6384000 sec  
RG 101  
DW 50.000 usec  
DE 6.50 usec  
TE 298.0 K  
DL 1.50000000 sec  
ID0 1  
ST01 500.3340026 MHz  
NUC1 1H  
P0 3.33 usec  
PL 10.00 usec  
PLW1 10.00000000 W

F2 - Processing parameters  
SI 16384  
SF 500.3300145 MHz  
WDW EM  
SSB 0  
LB 0.30 Hz  
GB 0  
PC 1.00

Israr-ul-Haq/ Dr Khalid/ IUH-I-111a/ DMSO  
<sup>1</sup>H-NMR

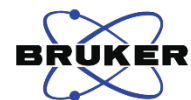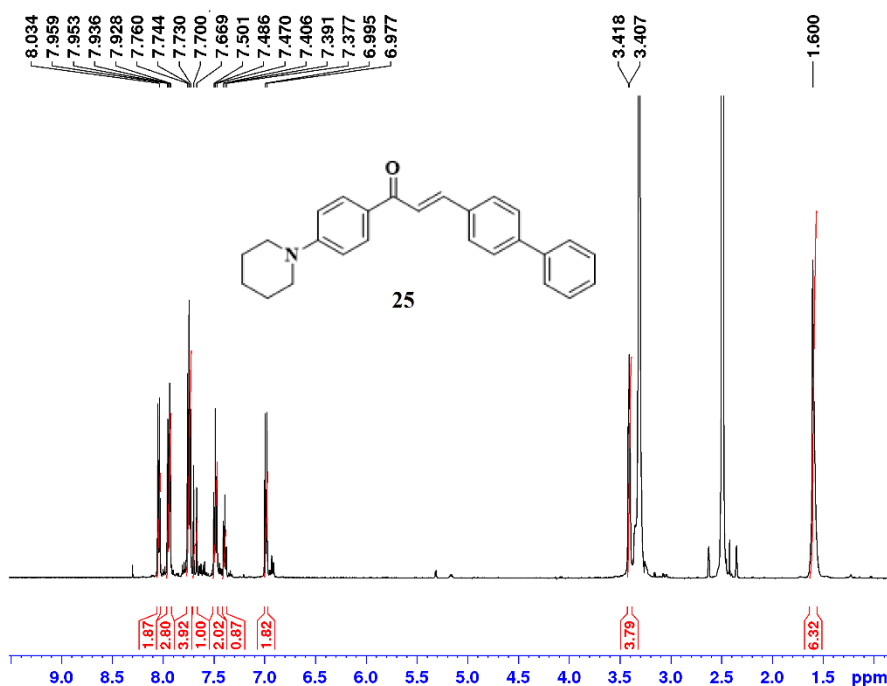

Current Data Parameters  
NAME Dec24-2020  
EXPNO 5  
PROCNO 1

F2 - Acquisition Parameters  
Date\_ 20201224  
Time 16.06 h  
INSTRUM Avance Neo 500  
PROBHD zgpg30 (ZH)  
PULPROG zgpg30  
ID 32768  
SOLVENT DMSO  
NS 128  
DS 4  
SWH 10500.000 Hz  
FIDRES 0.610332 Hz  
AQ 1.6384000 sec  
RG 100  
DW 50.500 usec  
DE 6.50 usec  
TE 299.0 K  
D1 1.50020000 sec  
IDC 1  
SFOL 500.3340026 MHz  
NUC1 1H  
PC 3.33 usec  
P1 10.00 usec  
PLW1 10.0000000 W

F2 - Processing parameters  
SI 16384  
SF 500.3300090 MHz  
WDW EM  
SSB 0  
LB 0.30 Hz  
GB 0  
PC 1.00

Israr-ul-Haq/ Dr Khalid/ IUH-I-129a/ DMSO  
1H-NMR

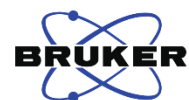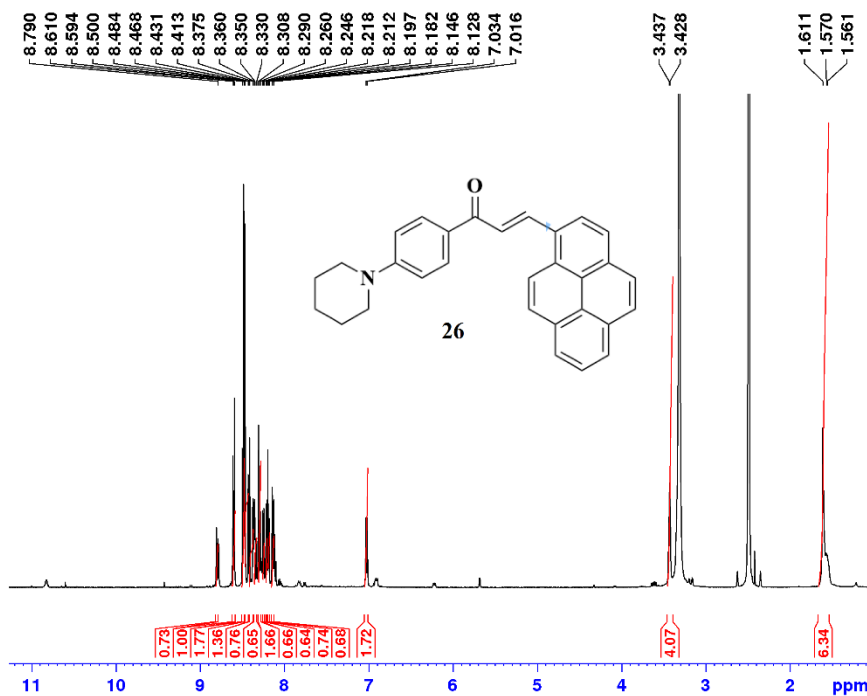

Current Data Parameters  
NAME Dec28-20  
EXPNO 2  
PROCNO 1

F2 - Acquisition Parameters  
Date\_ 20201228  
Time 11.51 h  
INSTRUM Avance Neo 500  
PROBHD Z8107\_0198 (FH  
PULPROG zg30  
TD 32768  
SOLVENT DMSO  
NS 128  
DS 0  
SWH 10000.506 Hz  
FIDRES 0.610352 Hz  
AQ 1.6384000 sec  
RG 101  
DN 50.000 usec  
DE 6.50 usec  
TE 298.0 K  
DC 1.50000000 sec  
TDO -  
SFO1 500.1340026 MHz  
NUC1 13  
PC 3.33 usec  
PL 10.00 usec  
PLW1 10.00000000 W

F2 - Processing parameters  
SI 16384  
SF 500.1300092 MHz  
WDW EM  
SSB 0  
LB 0.30 Hz  
GB 0  
PC 1.00

Israr/ Dr Khalid/ IUH-I-91a/ DMSO  
<sup>1</sup>H  
 300K

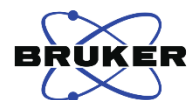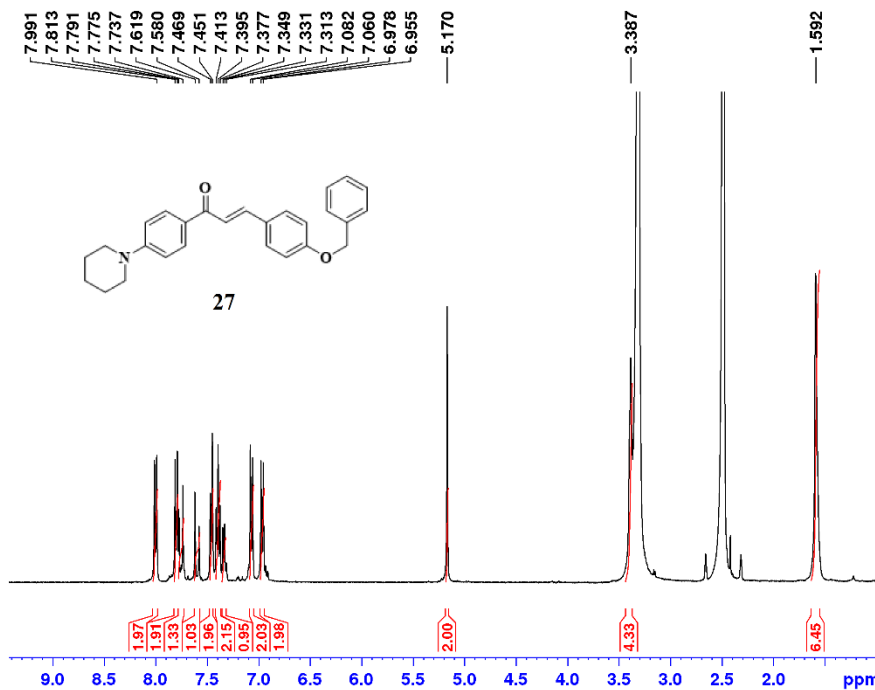

Current Data Parameters  
 NAME Dec03-20  
 EXPNO 9  
 PROCNO 1

F2 - Acquisition Parameters  
 Date\_ 20201203  
 Time 13.00 h  
 INSTRUM AVNuc-400  
 PROBHD zg30 (P)  
 PULPROG zg30  
 ID 32768  
 SOLVENT DMSO  
 NS 128  
 DS 4  
 SMH 7812.500 Hz  
 FIDRES 0.476837 Hz  
 AQ 2.0971520 sec  
 RG 655  
 SW 64.000 usec  
 DE 14.30 usec  
 IE 299.6 K  
 D1 1.50000000 sec  
 IDC 1  
 SFO1 399.9301994 MHz  
 NUCL 1H  
 PC 3.32 usec  
 P1 9.93 usec  
 PLW1 6.00000000 W

F2 - Processing parameters  
 SI 65536  
 SF 399.930070 MHz  
 WDW EM  
 SSB 0  
 LB 0.30 Hz  
 GB 0  
 PC 1.00

ISRAR-UL-HAQ/DR. KHALID/IUH-I-91a/DMSO  
BB

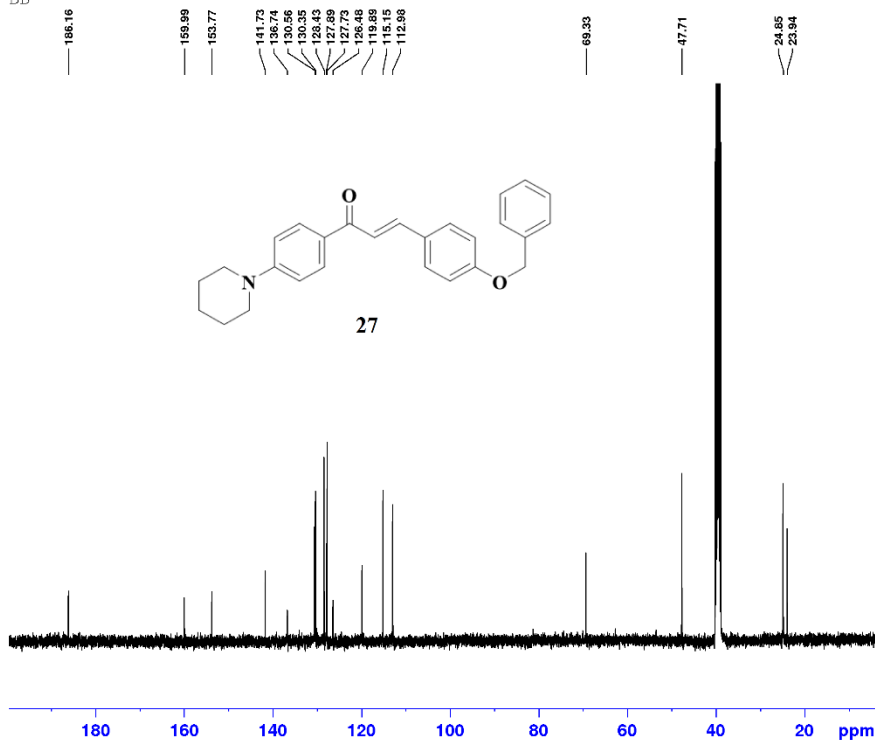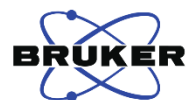

Current Data Parameters  
NAME Dec27-20  
EXPNO 1  
PROCNO 1

F2 - Acquisition Parameters  
Date\_ 20201228  
Time 0.27 h  
INSTRUM Avance NEO 400MHz  
PROBHD Z1-4854\_0013 (4  
PULPROG zgpg  
ID 32768  
SOLVENT DMSO  
NS 16384  
DS 8  
SWH 23829.523 Hz  
FIDRES 1.453218 Hz  
AQ 0.6881280 sec  
RG 23.4375  
DW 21.000 usec  
DE 9.50 usec  
TE 300.2 K  
D1 2.30200000 sec  
D11 0.03200000 sec  
TD 16  
SFO1 100.6243395 MHz  
NUC1 13C  
P1 10.00 usec  
PLW1 56.4300030 W  
SFO2 400.136005 MHz  
NUC2 1H  
CPDPRG2 waltz165  
PCPD2 90.00 usec  
PLW2 13.2130030 W  
PLW12 0.31972000 W  
PLW13 0.16080999 W

F2 - Processing parameters  
SI 32768  
SF 100.6243395 MHz  
WDW EM  
SSB 0  
LB 1.00 Hz  
GB 0  
PC 1.40

Israr-ul-Haq/ Dr Khalid/ IUH-I-165a/ DMSO  
1H-NMR

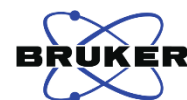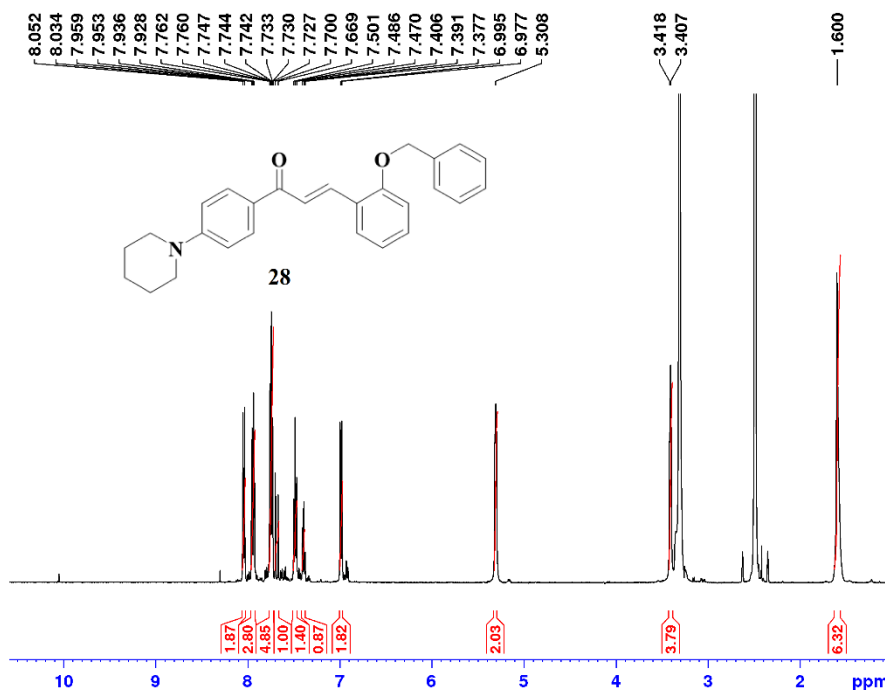

Current Data Parameters  
NAME Dec24-2020  
EXPNO 5  
PROCNO 1

F2 - Acquisition Parameters  
Date\_ 20201224  
Time 16.06 h  
INSTRUM Avance Neo 500  
PROBHD Z8107\_0198 (PH  
PULPROG zg30  
TD 32768  
SOLVENT DMSO  
NS 128  
DS 0  
SWH 10000.000 Hz  
FIDRES 0.610352 Hz  
AQ 1.6384000 sec  
RG 101  
DW 50.000 usec  
DE 6.50 usec  
TE 298.0 K  
D1 1.5000000 sec  
TDO -  
SFO1 500.3340026 MHz  
NUC1 1H  
FO 3.33 usec  
PI 10.00 usec  
PL1 10.0000000 W

F2 - Processing parameters  
SI 16384  
SF 500.3300000 MHz  
WDW EM  
SSB 0  
LB 0.30 Hz  
GB 0  
PC 1.00
